# Supplementary material
Source: PubMed Central journal article supplement (PMC3954721)
Supplement: NIHMS485222-supplement-2.pdf [file NIHMS485222-supplement-2.pdf]

## Supplementary Information

### ***BACH2* mediates negative selection and p53-dependent tumor suppression at the pre-B cell receptor checkpoint**

Srividya Swaminathan<sup>1</sup>, Chuanxin Huang<sup>2</sup>, Huimin Geng<sup>1</sup>, Zhengshan Chen<sup>1</sup>, Richard Harvey<sup>3</sup>, Huining Kang<sup>3</sup>, Carina Ng<sup>1</sup>, Björn Titz<sup>4</sup>, Christian Hurtz<sup>1</sup>, Mohammed Firas Sadiyah<sup>1</sup>, Daniel Nowak<sup>5</sup>, Gabriela B. Thoennissen<sup>5,10</sup>, Vikki Rand<sup>6</sup>, Thomas G. Graeber<sup>4</sup>, H. Phillip Koeffler<sup>5</sup>, William L Carroll<sup>7</sup>, Cheryl L Willman<sup>3</sup>, Andrew G. Hall<sup>6</sup>, Kazuhiko Igarashi<sup>8,9</sup>, Ari Melnick<sup>2</sup>, Markus Müschen<sup>1</sup>

Supplementary Figures and Legends 1-22

Supplementary Tables 1-8

## Supplementary Figure 1: Identification of genes with pre-B cell receptor checkpoint-specific expression pattern

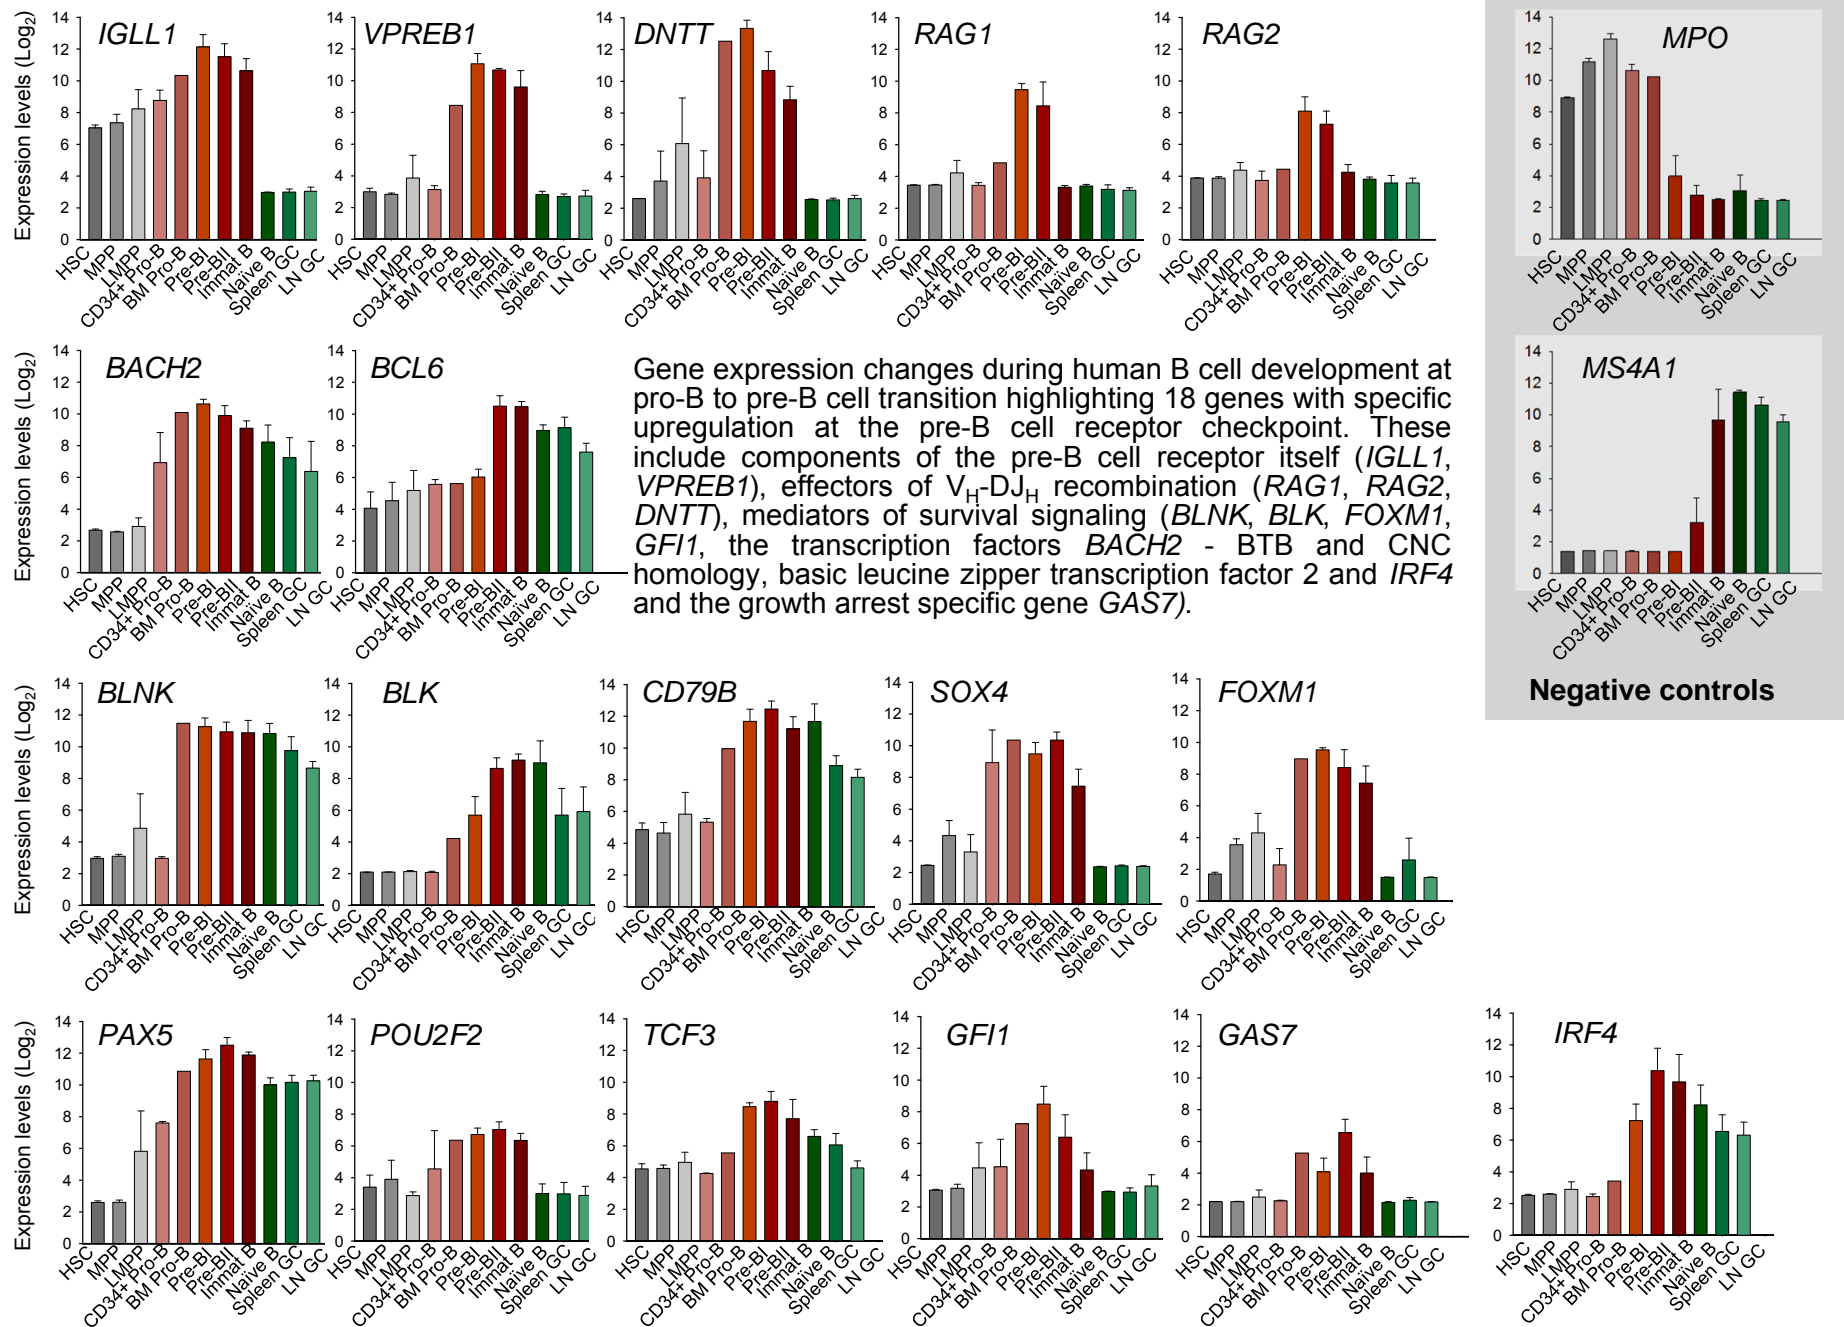

Microarray data from: <http://xavierlab2.mgh.harvard.edu/EnrichmentProfiler/>

**Supplementary Figure 2: BACH2 and BCL6 bind to promoters of identical tumor suppressor genes but have opposing roles on their transcriptional regulation**

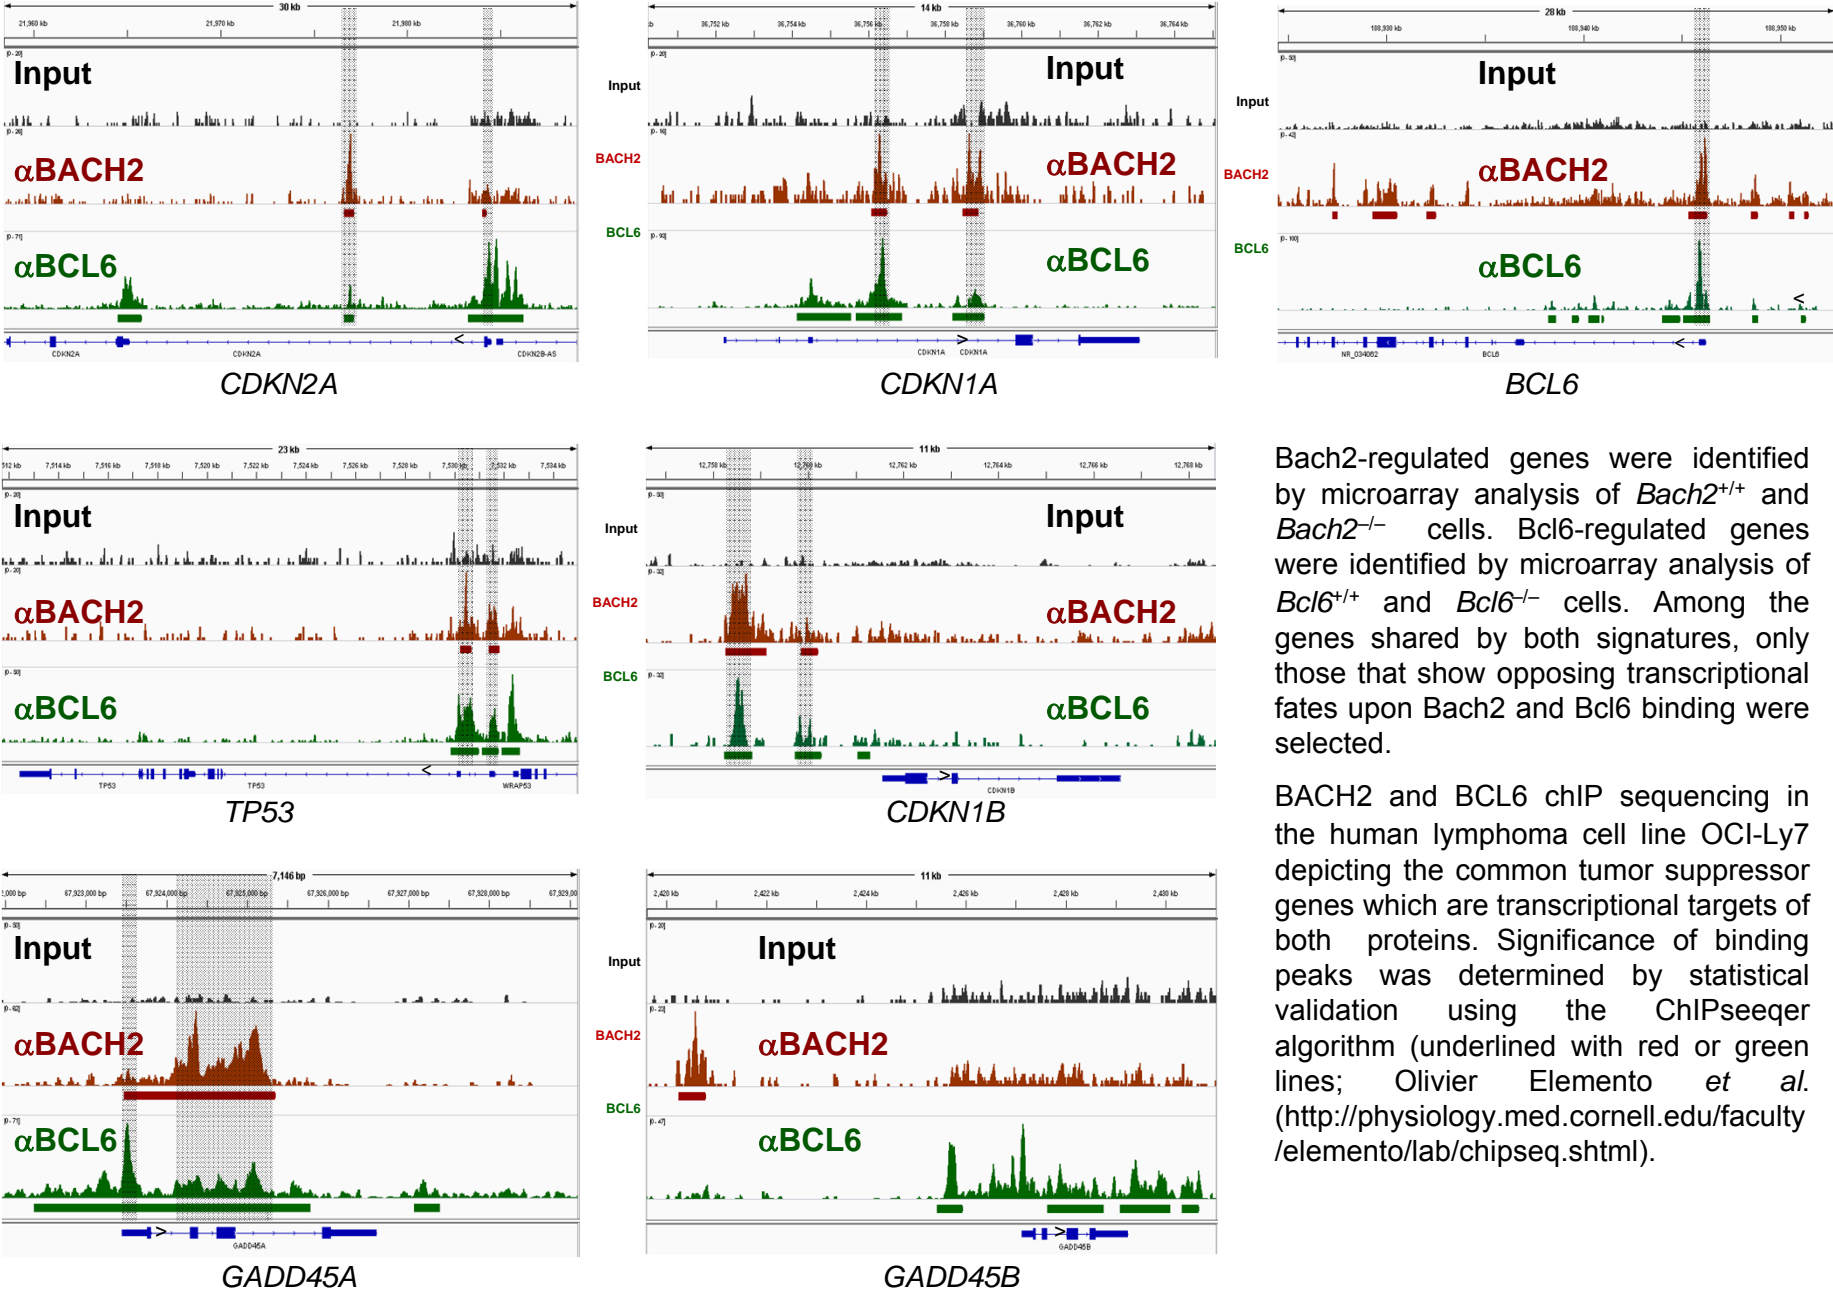

Bach2-regulated genes were identified by microarray analysis of *Bach2*<sup>+/+</sup> and *Bach2*<sup>-/-</sup> cells. Bcl6-regulated genes were identified by microarray analysis of *Bcl6*<sup>+/+</sup> and *Bcl6*<sup>-/-</sup> cells. Among the genes shared by both signatures, only those that show opposing transcriptional fates upon Bach2 and Bcl6 binding were selected.

BACH2 and BCL6 ChIP sequencing in the human lymphoma cell line OCI-Ly7 depicting the common tumor suppressor genes which are transcriptional targets of both proteins. Significance of binding peaks was determined by statistical validation using the ChIPseeqer algorithm (underlined with red or green lines; Olivier Elemento *et al.* (<http://physiology.med.cornell.edu/faculty/elemento/lab/chipseq.shtml>)).

**Supplementary Figure 3: Single-locus BACH2 qChIP for promoter-binding of genes that show opposite regulation by BACH2 and BCL6 in a primary human Ph<sup>+</sup> ALL sample**

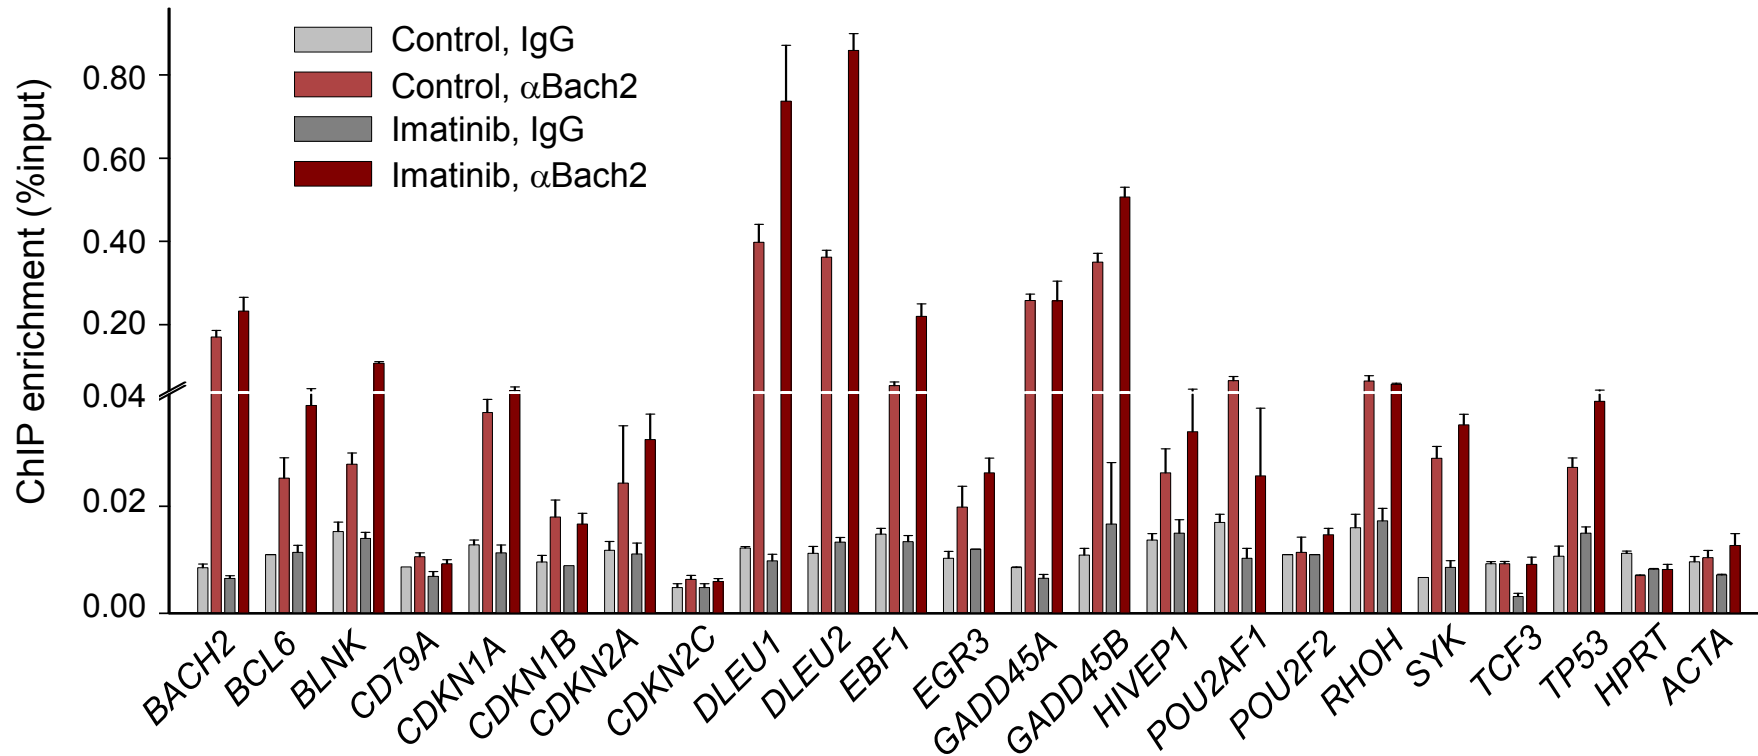

Bach2-regulated genes were identified by microarray analysis of *Bach2*<sup>+/+</sup> and *Bach2*<sup>-/-</sup> cells. Bcl6-regulated genes were identified by microarray analysis of *Bcl6*<sup>+/+</sup> and *Bcl6*<sup>-/-</sup> cells. From the common Bach2- and Bcl6-regulated genes, those were selected that show opposing transcriptional fates upon Bach2 and Bcl6 binding. Quantitative chromatin immunoprecipitation (qChIP) was performed using BACH2-specific antibodies or an IgG control. Enrichment of BACH2 at promoters of these genes in human Ph<sup>+</sup> ALL cells before (light red) and after (dark red) imatinib treatment is depicted in the bar chart. Target genes exhibiting stronger BACH2 binding are shown in the left panel and the loci with weaker overall BACH2 binding are shown in the right panel.

### Supplementary Figure 4: Genetic modulation of relative Bach2 vs Bcl6 expression

**Right:** Relative Bach2 and Bcl6 expression levels were genetically modulated by expressing an inducible vector system for Bach2 in *Bcl6*<sup>+/+</sup> and *Bcl6*<sup>-/-</sup> pre-B ALL cells (*BCR-ABL1*). *Bach2*<sup>+/+</sup>, *Bach2*<sup>-/-</sup>, and Bach2-overexpressing *Bcl6*<sup>+/+</sup> and Bach2-overexpressing *Bcl6*<sup>-/-</sup> pre-B ALL cells (*BCR-ABL1*) were studied for phenotypic differences using microarray analysis. Cloning of the tamoxifen-inducible Bach2-ERT<sup>2</sup> vector is described in the methods section. A schematic for the relative expression levels of Bach2 (red) and Bcl6 (green) is depicted at the top of the heatmap. Genes shown in the heatmap are selected based on three criteria:

- (1) Direct targets of BACH2 and BCL6 as identified by the BACH2 and BCL6 ChIPseq.
- (2) Downregulated by Bcl6 (fold change >1.5 and *P*<0.05 by t-test; GEO accession no. GSE20987: *BCR-ABL1*-transformed B cell precursors from *Bcl6*<sup>+/+</sup> and *Bcl6*<sup>-/-</sup> mice)
- (3) Upregulated by Bach2 (fold change >1.5, *P*<0.05) or no changes by Bach2 (fold change <1.5; GEO accession no. GSE30883: *BCR-ABL1*-transformed B cell precursors from *Bach2*<sup>+/+</sup> and *Bach2*<sup>-/-</sup> mice).

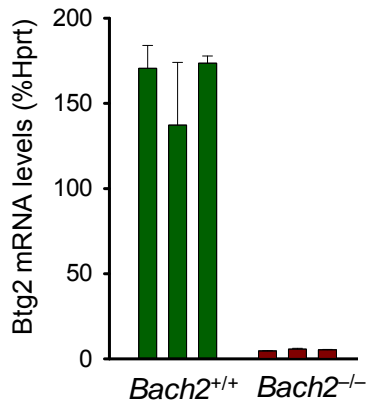

**Above:** Expression of Btg2 mRNA in *Bach2*<sup>+/+</sup> and *Bach2*<sup>-/-</sup> pre-B ALL cells (*BCR-ABL1*). Btg2 mRNA levels are plotted as percentage of the reference gene Hprt.

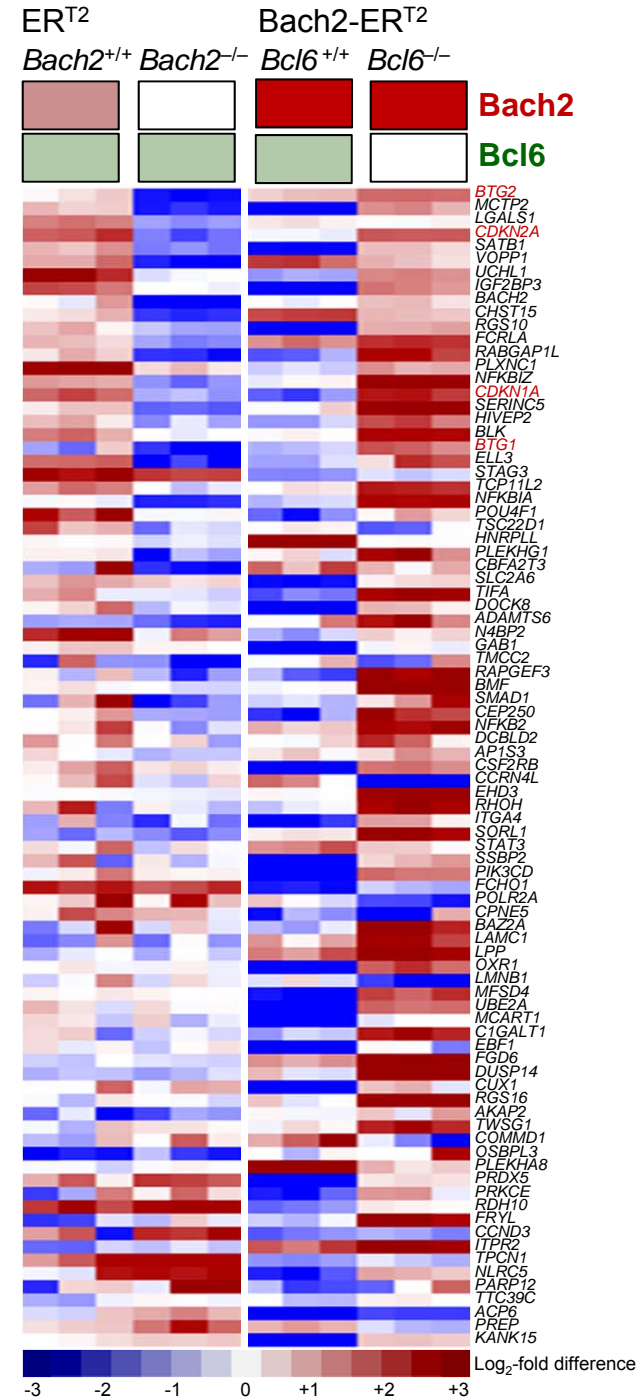

**Supplementary Figure 5: Bach2 inhibits recruitment of Bcl6 to *Cdkn2a* (*Arf*) and *Tp53* promoters**

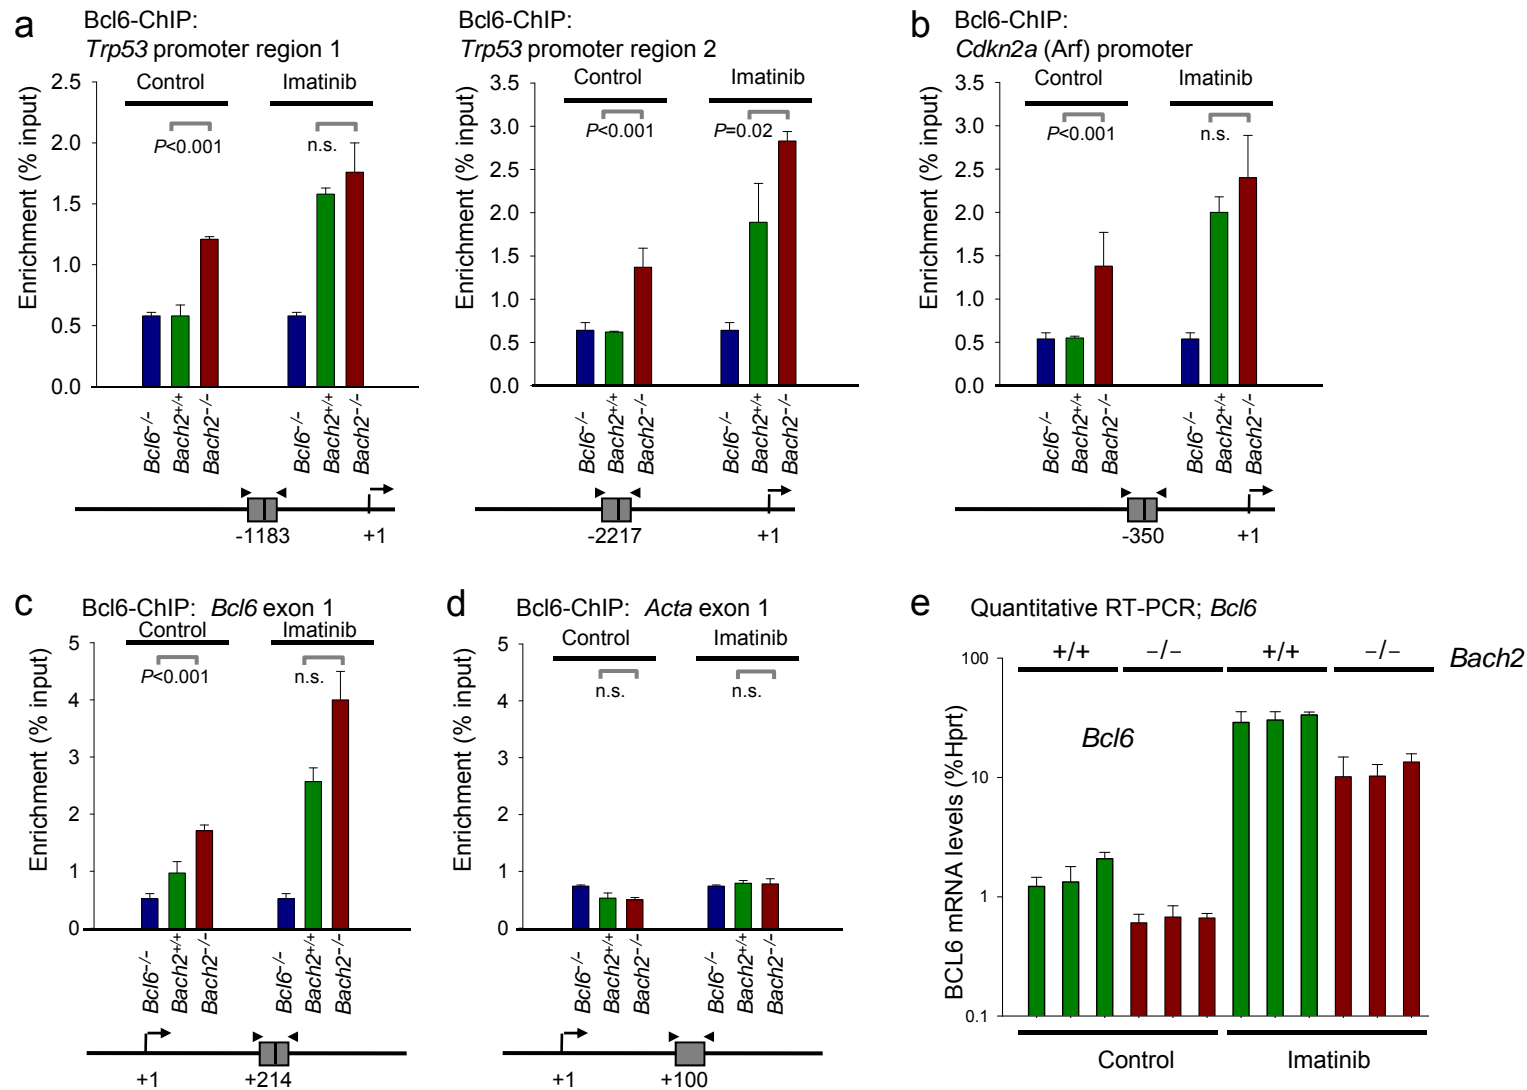

### Supplementary Figure 5: Bach2 inhibits recruitment of Bcl6 to *Cdkn2a* (*Arf*) and *Tp53* promoters, Legend

(a) Bcl6-ChIP was performed at two regions of the *Tp53* promoter, (b) one region of the *Cdkn2a* (*Arf*) promoter, (c) at *Bcl6* exon 1 (positive control for Bcl6 autoregulation, and (d) *Acta* exon 1 (negative control for non-specific binding. In all conditions a-d, *BCR-ABL1*-transformed pre-B ALL cells were studied in the presence or absence of Imatinib treatment ( $2 \mu\text{mol l}^{-1}$ , 24 hours). ChIP was performed using anti-Bcl6 IgG (Santa Cruz, Clone N3) or IgG controls. *BCR-ABL1*-transformed pre-B ALL cells were derived from *Bcl6*<sup>-/-</sup> (additional negative control) mice and *Bach2*<sup>+/+</sup> and *Bach2*<sup>-/-</sup> mice.

For *Tp53*, *Cdkn2a* (*Arf*) promoters, specific recruitment of Bcl6 was compared in the presence (*Bach2*<sup>+/+</sup>) and absence (*Bach2*<sup>-/-</sup>) of Bach2 and indicated on the y-axis as enrichment (% of input). Treatment with Imatinib results in high expression levels of Bcl6. In this case, Bcl6 was highly enriched at *Tp53* and *Cdkn2a* promoters regardless of Bach2. In the absence of Imatinib, expression levels of Bach2 are low. In this case, Bcl6 was only strongly enriched in the absence, but not in the presence of Bach2. These findings indicate that Bach2 negatively regulates binding of Bcl6 to *Tp53* and *Cdkn2a* promoters unless promoters are saturated in the presence of very high Bcl6 expression levels. (e) To address the possibility that higher enrichment of Bcl6 at *Tp53* and *Cdkn2a* promoters in *Bach2*<sup>-/-</sup> leukemia cells may reflect higher expression levels of Bcl6 in these cells, we performed qRT-PCR analysis of Bcl6 in *Bach2*<sup>+/+</sup> and *Bach2*<sup>-/-</sup> leukemia cells for Bcl6 mRNA.

## Supplementary Figure 6: Bach2 reverses Bcl6-mediated repression of Arf and Tp53

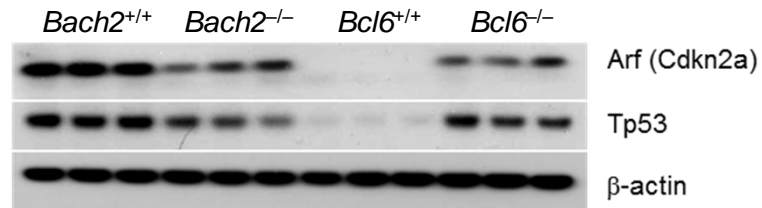

Western blot for Arf (Cdkn2a) and Tp53 in *Bach2*<sup>+/+</sup>, *Bach2*<sup>-/-</sup> and *Bcl6*<sup>+/+</sup> and *Bcl6*<sup>-/-</sup> pre-B cells transformed with *BCR-ABL1*.  $\beta$ -actin was used as loading control. It should be noted that *Bach2*<sup>+/+</sup> (C57BL6/SV129) and *Bcl6*<sup>+/+</sup> (C57BL6/SV129) pre-B ALL cells have significantly different baseline levels of Arf and Tp53 expression, which likely reflects the different admixture of C57BL6 and SV129 in these mice. For this reason, exposure of Western blots was adjusted for comparable Arf and Tp53 baseline expression levels in *Bach2*<sup>+/+</sup> and *Bcl6*<sup>+/+</sup> pre-B ALL cells.



Supplementary Figure 7: Measurement of  $V_H$ -DJ<sub>H</sub> recombinase activity in *Bach2*<sup>+/+</sup> and *Bach2*<sup>-/-</sup> pre-B cells

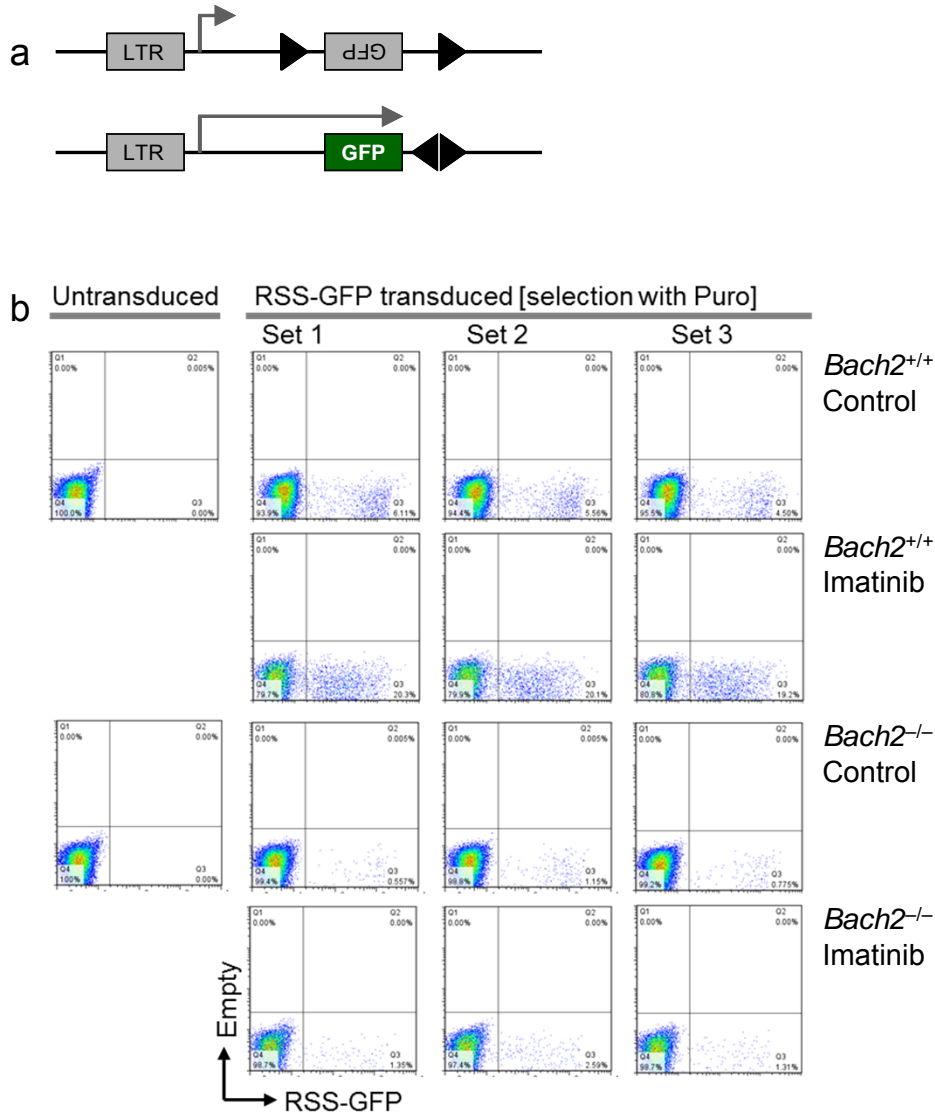

(a) A retroviral vector that reports recombinase activity in transduced cells. The vector carries an inverted GFP flanked by recombination signal sequences (RSS; depicted as black triangles) and a puromycin resistance cassette. (b) Recombinase activity in *Bach2*<sup>+/+</sup> and *Bach2*<sup>-/-</sup> pre-B ALL cells (*BCR-ABL1*) transduced with the vector shown in (a), before and after imatinib treatment.

Supplementary Figure 8: Sequence analysis of V<sub>H</sub>-DJ<sub>H</sub> junctions in *Bach2*<sup>+/+</sup> and *Bach2*<sup>-/-</sup> B cells

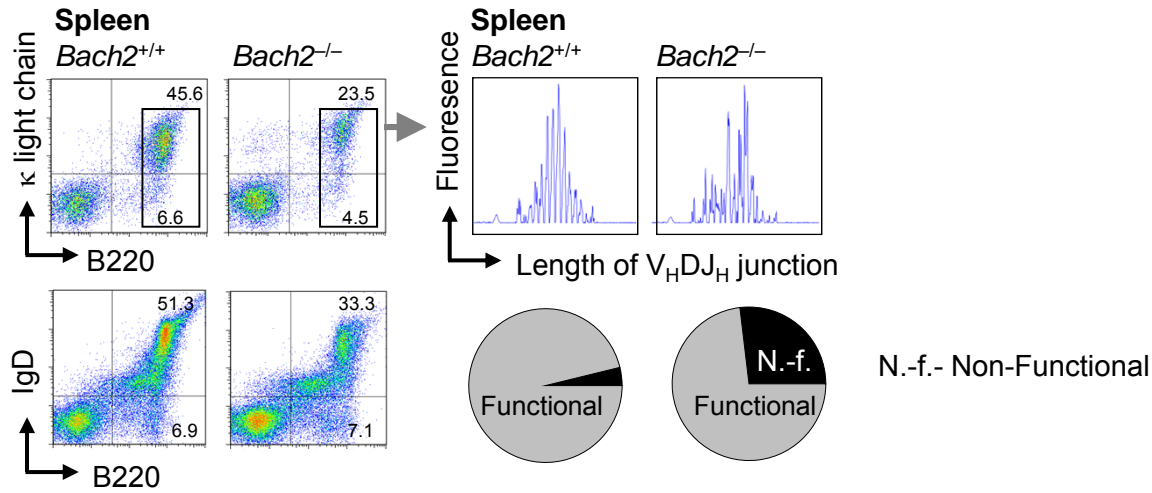

**Bone marrow**  
*Bach2*<sup>+/+</sup> *Bach2*<sup>-/-</sup>

|                            |                             |
|----------------------------|-----------------------------|
| CARSHGSKGYDMDYW            | CARGE <del>G</del> SN#YFDYW |
| CARGLRSHYAMDYW             | CARGYYGSRRLGLYYFDYW         |
| CARSECDGYAYAMDYW           | CARGG#FAYW                  |
| CARGGGRYLLDYW              | CARSGAYNSKG#AMDYW           |
| CARSYGSSYDYFDYW            | CARGYYGSRRLGLYYFDYW         |
| CARGGAYW                   | CARSNTQAT#FAYW              |
| CARRG*#YAMDYW              | CARDYYGSSWYFDYW             |
| CARSITGTSRFAYW             | CARPFNYYKKGSG#YFDYW         |
| CARFYDYDDYFDYW             | CARFDDGYLAW#FAYW            |
| CARGGYW                    | CARRSSYLWYFDYW              |
| CARGQLGLREGAYW             | CAREGEQLRLR#FAYW            |
| CARKSGYLLFAYW              | CVITTVRYFDYW                |
| CARGG*GG#DYW               | CASGGITTY#YYAMDYW           |
| CARSDYDAFAYW               | CARGGFAYW                   |
| CARGDYGYGFAYW              | CALGNYTGDY#W                |
| CAREGITTVVAERYFDYW         | CASGGITTVVAT#FAYW           |
| CAAVDGYFFDYW               | CARRLRYFDYW                 |
| CARDSSGYFDYW               | CALPLYAMDYW#                |
| CAREGDVGPAPFAYW            | CARFYYGSSYWFYFDYW           |
| CARDRVFDYW                 | CARGLR##YFDYW               |
| CARGDYDDYAMDYW             | CAREGRGLRAWFAYW             |
| CARNYYGSSYGYFDYW           | CARFYGYFDYW                 |
| CAREGDDYDGYAMDYW           | CVKGG*LRL#WFAYW             |
| CARFEEYFDYW                | CARHSLRLRGFAYW              |
| CASPRITYTN#YAMDYW          | CASPYYG**LW#YW              |
| C <del>T</del> RNWDGYAMDYW | CARGLYARQKYFDYW             |

P=0.00189

**Spleen**  
*Bach2*<sup>+/+</sup> *Bach2*<sup>-/-</sup>

|                      |                         |
|----------------------|-------------------------|
| CTRAYGSLFDYW         | CARFGSWYFDVW            |
| CARTGYFFDYW          | CARGLITTVPNYYAMDYW      |
| CARWITTEGYFDVW       | CARGG#FAYW              |
| CARGGNYGYFDVW        | CARAFYYAMDYW            |
| CARSGTYW             | CARKDIPRAAMDYW          |
| CARGDYW              | CARDIPYYGIDYW           |
| CAKAFTTVVFDYW        | CARGYYGK*##DYW          |
| CTRGGGYW             | CARGE <del>L</del> FDYW |
| CAHSSGSPYFDYW        | CVLYDG#YEYFDVW          |
| STR*GSSTMITG#AMDYW   | CARSSYGNWGYFDVW         |
| CARGLDYDGGYAMDYW     | CARVYYDYDG#YFDYW        |
| CARGDYW              | CAKITTVVATDFDVW         |
| CARDGNWYFDVW         | CARNLLHEPRDYW           |
| CARRDYYGSSYLGMAMYW   | CAGITTVGKPFDYW          |
| CARSNDYFDYW          | CARYPLLR**#FFDYW        |
| CARSGSYYGSSFAYW      | CARPSPLLR**L##YAMDYW    |
| CARSLYDYPSPWFAYW     | CARPDGYRGFAYW           |
| CARKQGDPFRFAYW       | CARDYDYFFFDYW           |
| CARWGTVPAMDYW        | CARSGLDYDGRGYFDYW       |
| CARSRGSITTVVATDYFDYW | CARGGFAYW               |
| CACYDYDVGFAW         | CARSKHYGSSSYFDYW        |
| CARTRDYYGSSSYAMDYW   | CARRGTTYAMDYW           |
| CARSRLQLGYYYAMDYW    | CARYSNYAMDYW            |
| CAQGGLLLRSFAYW       | CARDGSSYFDYW            |
| CTCSWNYYAMDYW        | CARDFITTVVAT#FDYW       |
| CAREGYGSSYGGYW       | CTIYYGNLGFAYW           |

P=0.02032

Non-productive (grey background)  
 Potentially productive (white background)

## Supplementary Figure 9: Inducible overexpression of Bach2

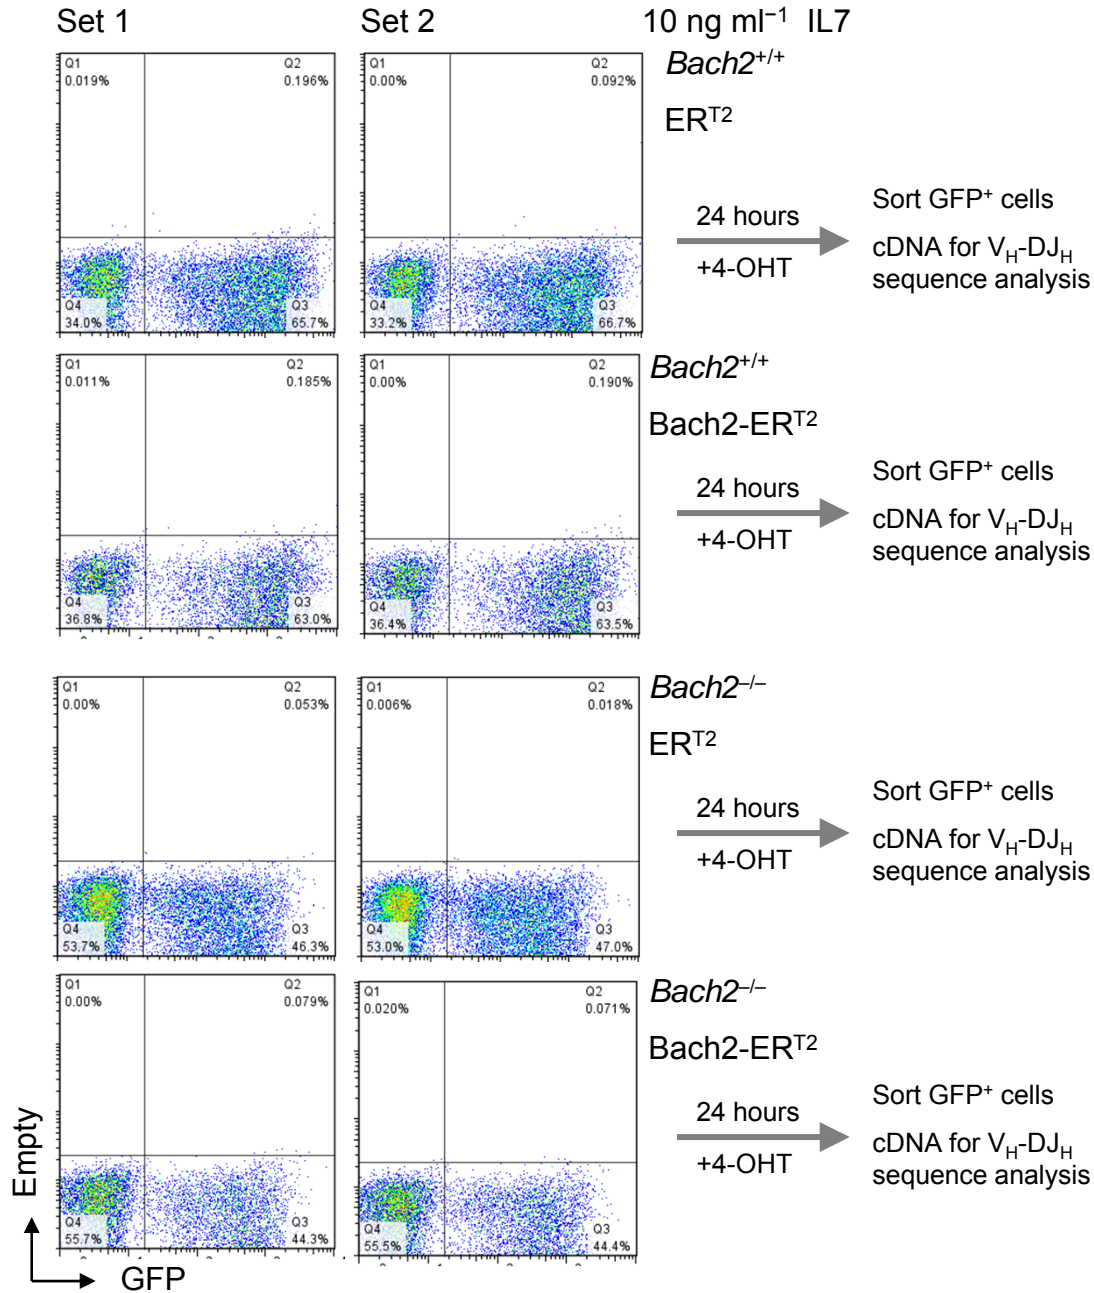

*Bach2*<sup>+/+</sup> and *Bach2*<sup>-/-</sup> IL-7-dependent pre-B cells were transduced with empty vector (EV-ERT<sup>2</sup>) or with Bach2-ERT<sup>2</sup>. Induction with tamoxifen for 24 hours resulted in Bach2 translocation to the nucleus in the groups carrying the Bach2-ERT<sup>2</sup> construct. Following this, V<sub>H</sub>-DJ<sub>H</sub> junctions were sequenced.

**Supplementary Figure 10: Inducible overexpression of Bach2 rescues the negative selection defect seen in *Bach2*<sup>-/-</sup> pre-B cells**

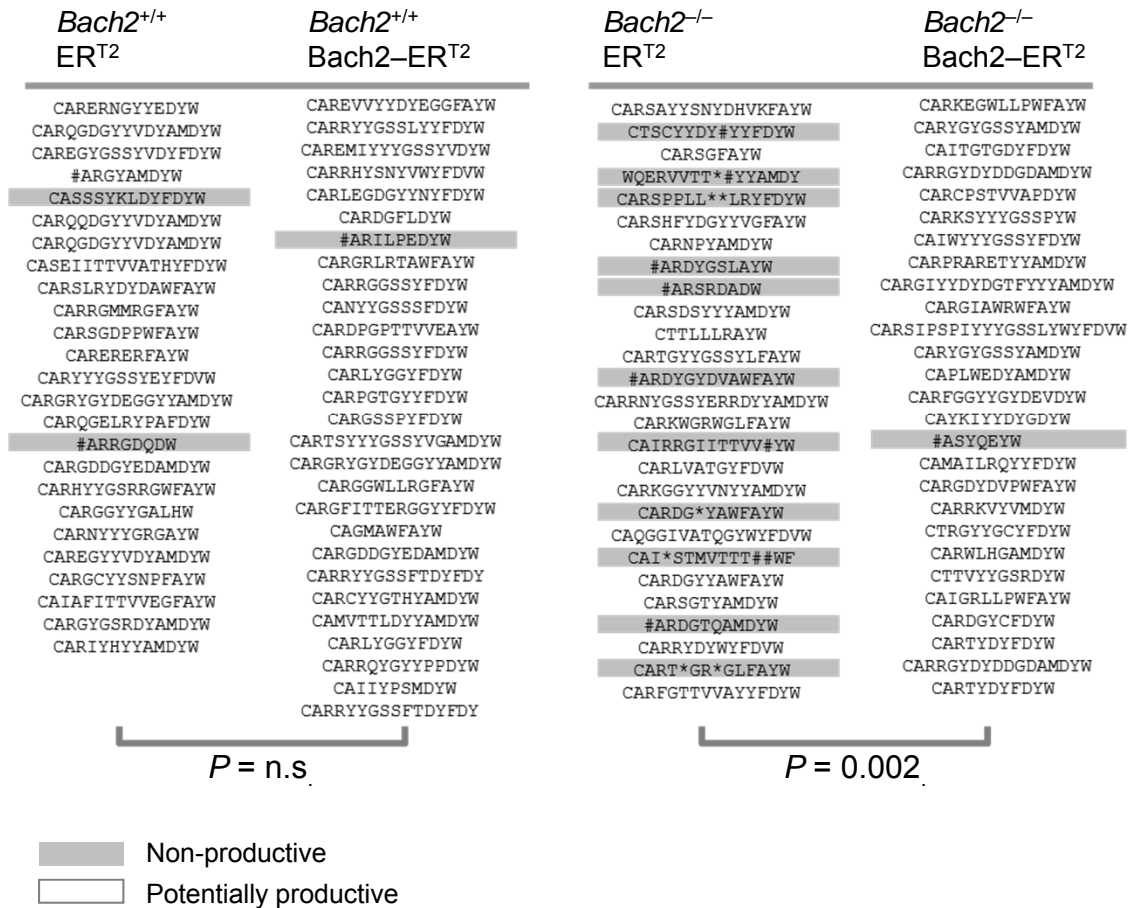

The sequences of the V<sub>H</sub>-DJ<sub>H</sub> junctions obtained after carrying out the rescue experiment as described in Supplementary Figure 9. Non-productive rearrangements are shaded gray while productive ones are indicated by white background.

## Supplementary Figure 11: Common retrovirus integration sites in the *Bach2* locus in B lymphoid malignancies

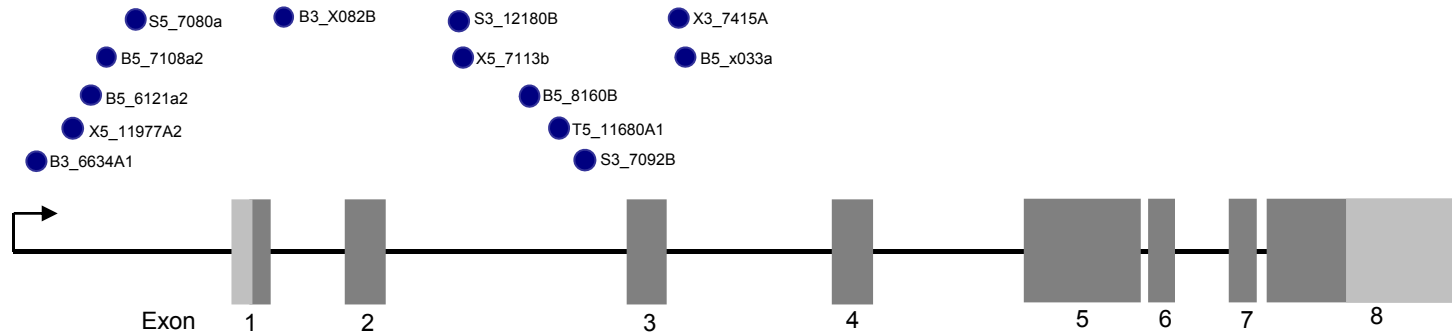

Sequence of 50 bp regions flanking the common integration sites of *Bach2*

|                   | 5' to CIS                                           | 3' to CIS                                           |
|-------------------|-----------------------------------------------------|-----------------------------------------------------|
| <b>B3_6634A1</b>  | TTAGAATACTAAACGTGACACTCCTGGCTGACTGGCATTAAATGCACCTT  | CAAAAGTGCCAGTTTTCCCTTGGAAAGTAATTCAGCAGCAATCGGCTA    |
| <b>X5_11977A2</b> | TCAGGCTGCCAGGCTTTTGTGGCCACTGTCTTACCCACCAAGCCACCTC   | ATTGTCCTTAATATTCATGGATTTTTTTTGAAGATTTAATAATGGTTGAA  |
| <b>B5_6121a2</b>  | GGCTACTACCACACACACACACACACACACACACACACACACACAC      | ACACACACACACACACTGCATTCCTCTGGAGGCATAATAGGAGTGTGG    |
| <b>B5_7108a2</b>  | AAAATGTGTTAAAATGTTAGTCATCACACTATATGACTAAGGACCTATGG  | TTGTTGTAICTTTTTGCTCTTCCAGCATTGCTGAACAGCTTCCACATTAT  |
| <b>S5_7080a</b>   | GACATTAAGGTTGGTCCAGGCCTTGAGACTGCCTCATCTGAAAGCCTGC   | TGGTACCCACCCCCACTCCACCCTGGGCTCTCTTGCCTGCTACTCTCC    |
| <b>S3_12180B</b>  | TGGCCCTACATGTACTCTGAATGTATTCCTCTGTACTCTTAATACTTTAAT | AGAACTGTTTCTTCCCTGACTTCTAAATTGTCAAGAAAAAAATACTG     |
| <b>X5_7113b</b>   | TATGTCTGAGAATGAACAGACAAAAGTTCTAACTCATGAAGCTTATACGC  | AGCCAGGAGGAAAAAGATAAGCAAGAAGCAACGGATGGTCTGTGTT      |
| <b>B5_8160B</b>   | TTATTTCCAGGACCCCTCAGGGAAGACCCCAAACTCACTGGTGACATG    | GGTCATATGTGCCAGATATGATCTTGTGACTCTGGGACATGACAGGATTG  |
| <b>T5_11680A1</b> | GCAGGTACCAGTGTCACTTCAGAACGCCTCTTATCAAGCAACAACAATTG  | TATATTTTGGTTAAATTTCCACCCTTGGACTGATGTCTTTTATATCA     |
| <b>S3_7092B</b>   | GGTTGTTGGGAAGAGAGAGCTCGGCAGAGATCAGTTAAGAGTACAGTT    | TCTCTTGGAAAGGAAACAGAAGTCCTTTTACTTTGAGAATAGTAAGTCCAG |
| <b>X3_7415A</b>   | AGCCCTGCAGGTTGTGCTCCCTTACCAGAGAGTGATGGCCAGTTCTCTC   | TAGTTTCTGGATAATGAGCCAGTGACAGGTAACGATGCCTTTCTCACGG   |
| <b>B5_x033a</b>   | GATAAGTCAACCTTGTFTTCCATGAAAGTCTGAGACAGAAAAAGAATGA   | AAGTACAACAGTGACTGGAAAAAGTGTACACACTTGAGCCACTTTGCA    |

The data of Retrovirus Integration Sites (RISs) in the RTCGD is obtained from using a high-throughput inverse PCR method or splinkerette method. Independent RISs were cloned and sequenced from tumor and then added to RTCGD. Then, by using public UCSC mouse genome server, these RIS sequences were positioned in the mouse genome and candidate genes were identified. [http://variation.osu.edu/cgi-bin/rtcgd/hits\\_finder.cgi?dataset=retrovirus&assembly=mm9&mouse\\_symbol=Bach2&cischeck=1&mouse\\_chr=chr4](http://variation.osu.edu/cgi-bin/rtcgd/hits_finder.cgi?dataset=retrovirus&assembly=mm9&mouse_symbol=Bach2&cischeck=1&mouse_chr=chr4)

## Supplementary Figure 12: Overexpression of Bach2 in primary Ph<sup>+</sup> ALL cells

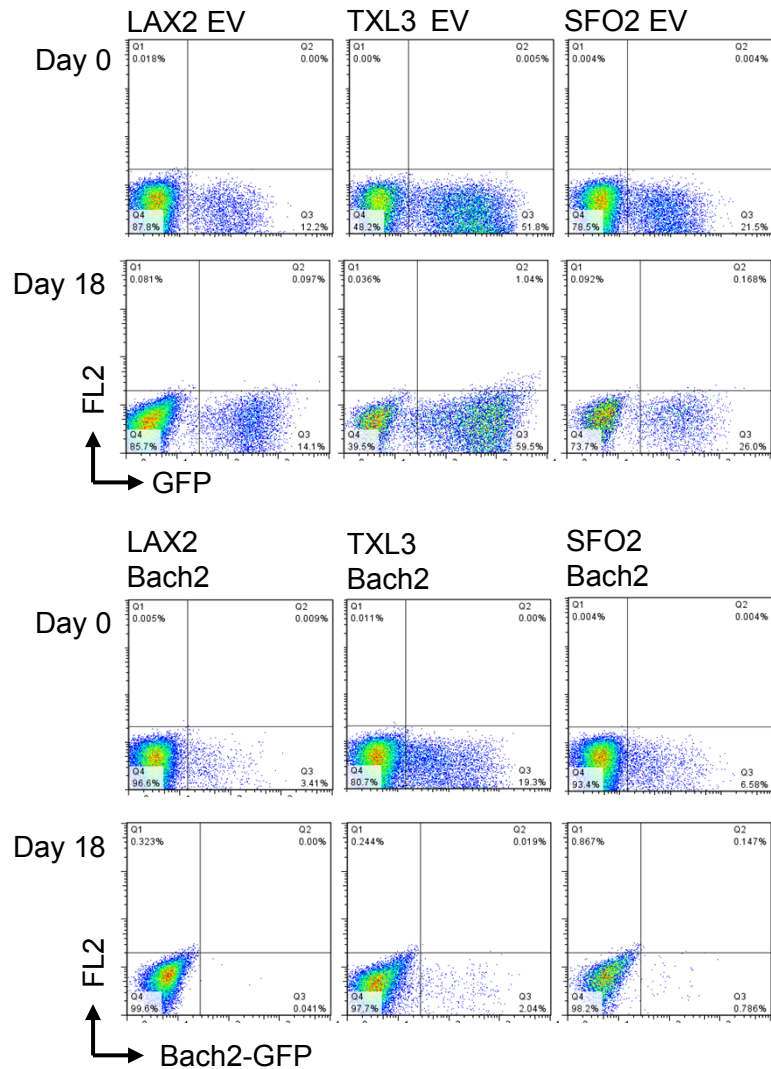

Primary human Ph<sup>+</sup> ALL cells were transduced with Bach2-GFP or GFP empty vector (EV) controls. The ratio of transduced (GFP<sup>+</sup>) and non-transduced (GFP<sup>-</sup>) cells was monitored over time (Days 0-18). Representative FACS analysis of days 0 and 18 showing reduction in percentage of GFP<sup>+</sup> cells in three patient-derived Ph<sup>+</sup> ALL cases upon overexpression of Bach2-GFP.

### Supplementary Figure 13: Tp53 is required for Bach2-mediated tumor suppression

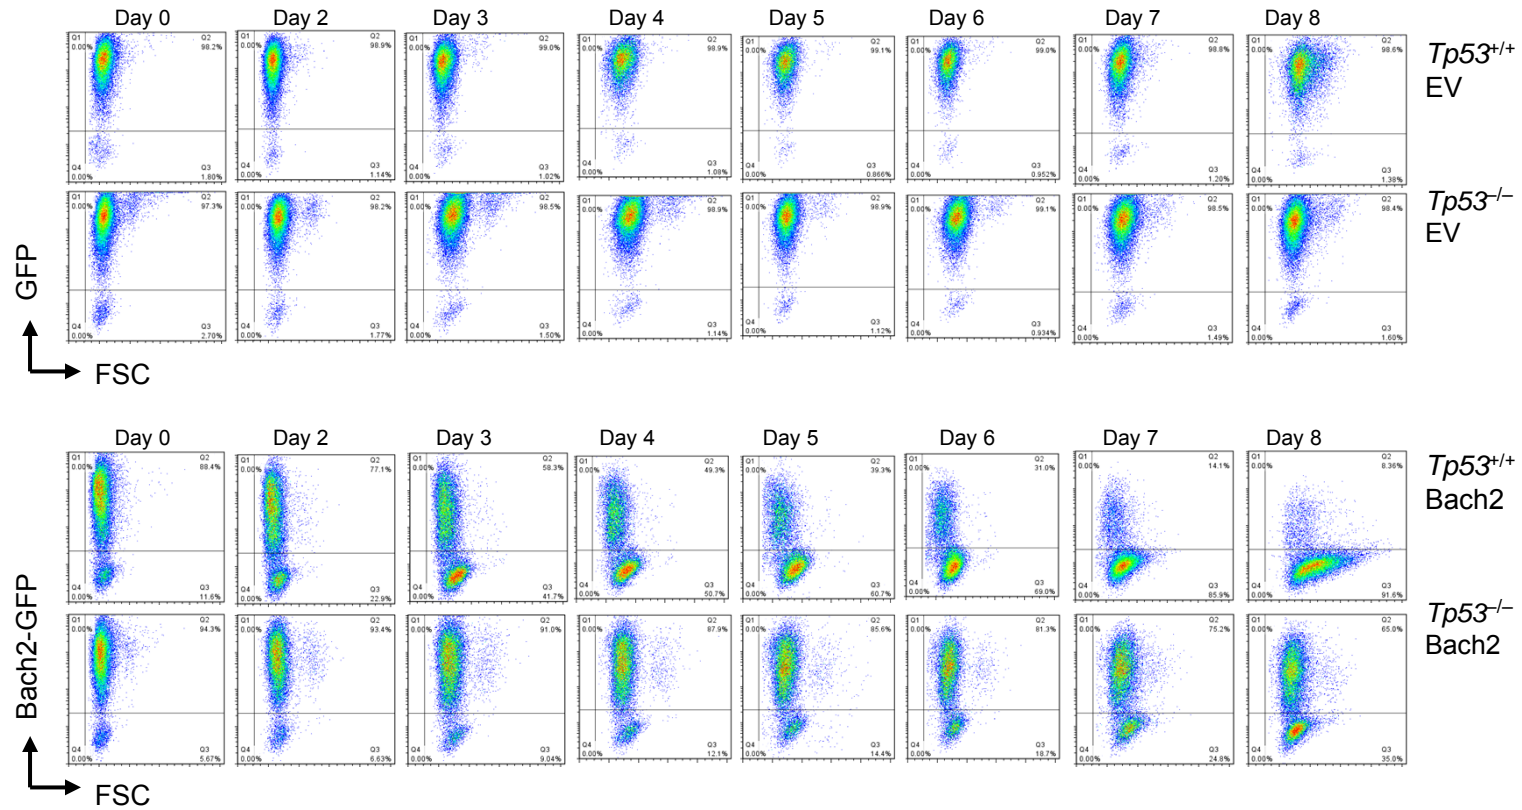

*Tp53*<sup>+/+</sup> and *Tp53*<sup>-/-</sup> leukemia cells were transduced with Bach2-GFP or GFP empty vector controls. The ratio of transduced (GFP<sup>+</sup>) and non-transduced (GFP<sup>-</sup>) cells was monitored over time (Days 0-8).

**Supplementary Figure 14: Somatic mutations of the *BACH2* gene in primary Ph<sup>+</sup> ALL samples**

| Ph <sup>+</sup> ALL case | N | Sequence         | Aa change       | Clinical       | Karyotype                                                                                                                       |
|--------------------------|---|------------------|-----------------|----------------|---------------------------------------------------------------------------------------------------------------------------------|
| TXL2                     | 0 |                  |                 | at diagnosis   | t(9;22)(q34;q11)                                                                                                                |
| TXL3                     | 1 | C1039T           | R111C           | at diagnosis   | t(9;22)(q34;q11)                                                                                                                |
| ICN1                     | 2 | C1779T<br>C1039T | Silent<br>R111C | at diagnosis   | t(9;22)(q34;q11)                                                                                                                |
| SFO2                     | 1 | C1039T           | R111C           | at diagnosis   | t(9;22)(q34;q11)                                                                                                                |
| LAX2                     | 0 |                  |                 | T315I, Relapse | t(9;22)(q34;q11)                                                                                                                |
| LAX9                     | 1 | C1779T           | Silent          | at diagnosis   | t(9;22)(q34;q11)                                                                                                                |
| BLQ1                     | 2 | G938T<br>C1039T  | S77I<br>R111C   | T315I, Relapse | FISH der(9), der(22)                                                                                                            |
| BLQ5                     | 0 |                  |                 | T315I, Relapse | FISH der(9), der(22)                                                                                                            |
| BLQ11                    | 0 |                  |                 | T315I, Relapse | FISH der(9), der(22)                                                                                                            |
| PDX59                    | 2 | A2214G<br>C1039T | Silent<br>R111C |                | 46,XY,del(9)(p13),t(9;22)(q34;q11.2)[12]/46,XY,del(9)(p13),der(9)t(9;22)(q34;q11.2),ider(22)(q10)t(9;22)(q34;q11.2)[4]/46,XY[7] |

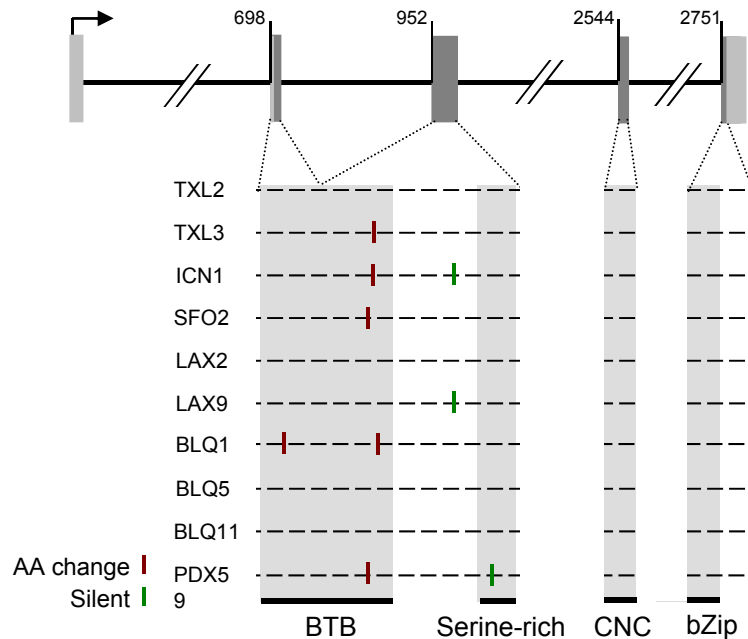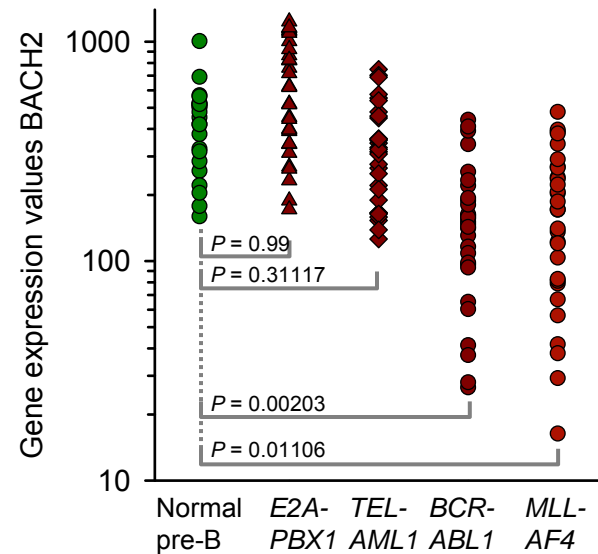

The coding sequence of *BACH2* was amplified and sequenced from 10 primary cases of Ph<sup>+</sup> ALL. Details of these leukemia cases are summarized in the Table (top). In five cases, point mutations encoding amino acid changes in the *BACH2* BTB domain were found (diagram, bottom left). A metaanalysis of publicly available gene expression data was performed to compare mRNA levels of *BACH2* in normal pre-B cells (green) to pre-B ALL subtypes with different cytogenetics (red) (bottom right).



**Supplementary Figure 15: Bach2 expression levels are lower at relapse in pediatric ALL patients than that observed at the time of diagnosis**

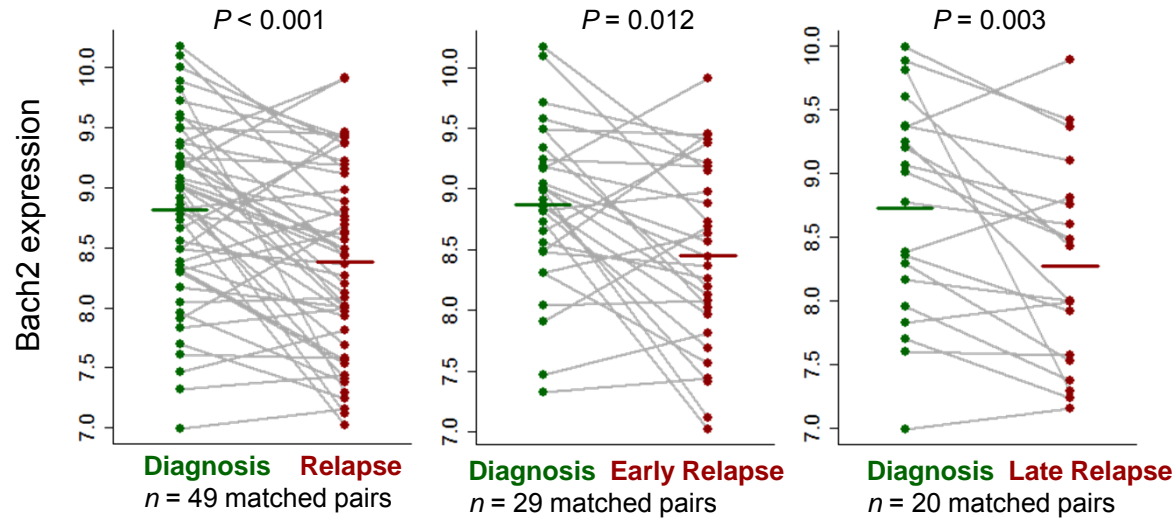

A comparison of the expression levels of Bach2 mRNA at diagnosis and relapse in matched sample pairs of pediatric ALL patients. The left panel shows all 49 pairs of Diagnosis-Relapse samples, the middle and right panels show early ( $n = 29$ ) and late relapses ( $n = 20$ ) respectively. Bach2 mRNA levels are significantly decreased in most patients at relapse demonstrating that low levels of Bach2 expression are associated with relapse of leukemia.

**Supplementary Figure 16: Low level of BACH2 is an independent predictor of poor outcome in patients with ALL**

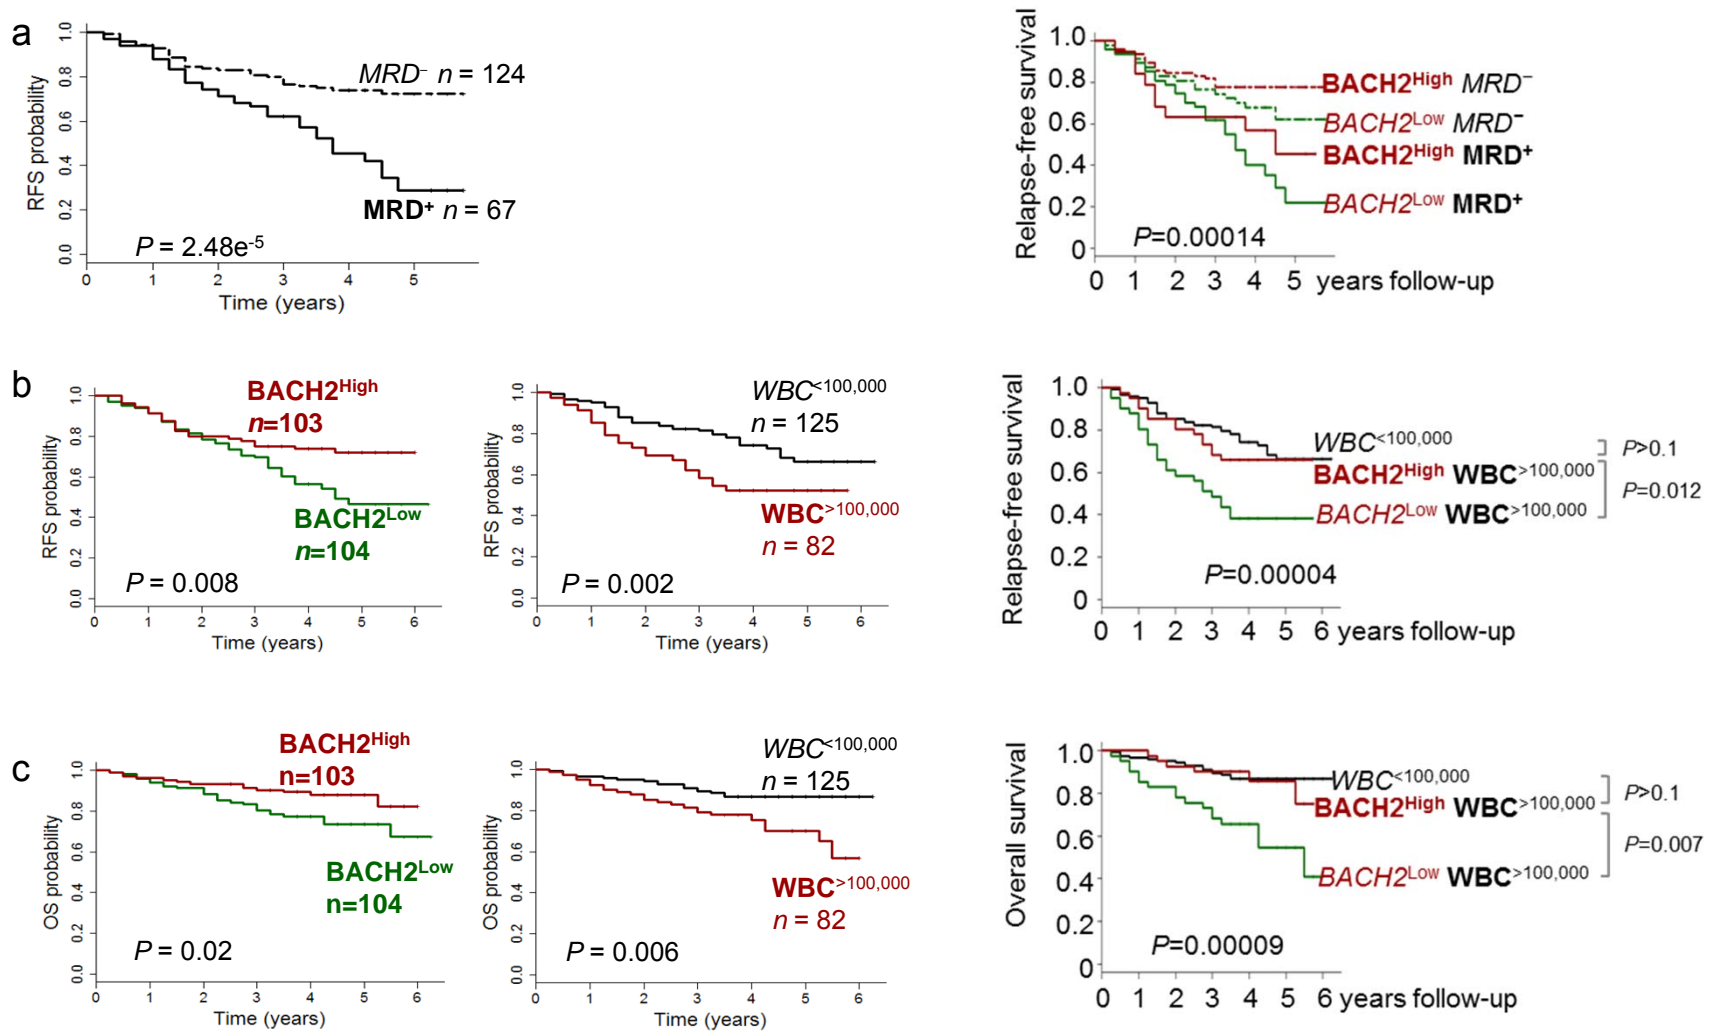

Positive minimal residual disease (MRD on day 29 post treatment) and white blood cell count (WBC >100,000) were used as indicators of high risk ALL. **(a)** Kaplan-Meier analysis of relapse free survival (RFS) for patients with and without positive MRD status on day 29 is shown. A multivariate analysis of Bach2 mRNA levels versus MRD status on day 29 is shown in pediatric ALL to compare RFS in patients (P9906) with higher and lower than median mRNA levels of Bach2 (a, right). Multivariate analysis of Bach2 mRNA levels versus WBC count to compare **(b)** relapse free survival (RFS) and **(c)** overall survival (OS) of pediatric patients.

**Supplementary Figure 17: Low level of BACH2 is an independent predictor of poor outcome in patients with high risk ALL**

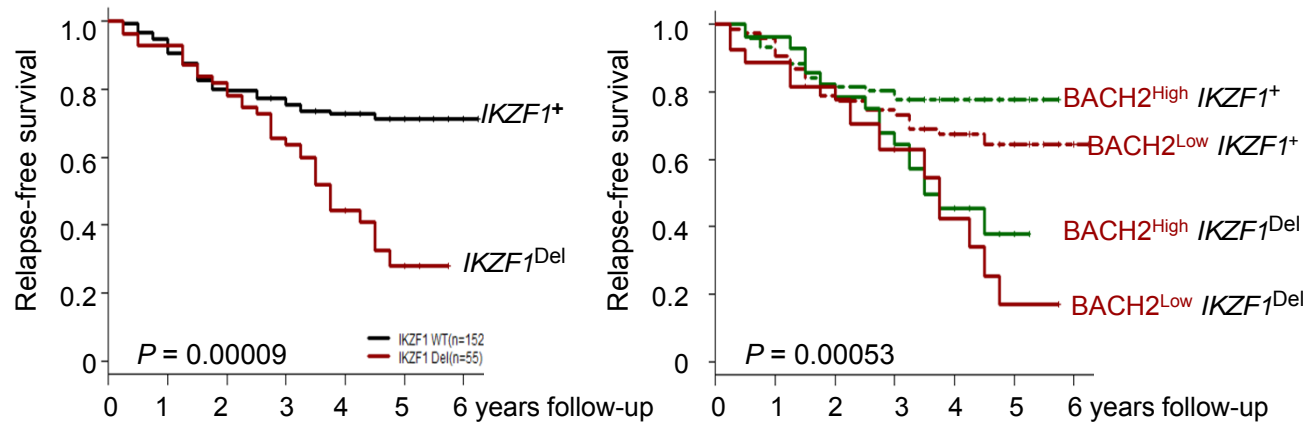

Multivariate analysis showing *BACH2* mRNA levels as an independent predictor of poor clinical outcome in high risk ALL patients with *IKZF1*-deletion ( $P = 0.00053$ ).

**Reference:**

Mullighan CG, Su X, Zhang J, Radtke I, Phillips LA, Miller CB, Ma J, Liu W, Cheng C, Schulman BA, Harvey RC, Chen IM, Clifford RJ, Carroll WL, Reaman G, Bowman WP, Devidas M, Gerhard DS, Yang W, Relling MV, Shurtleff SA, Campana D, Borowitz MJ, Pui CH, Smith M, Hunger SP, Willman CL, Downing JR; Children's Oncology Group. Deletion of *IKZF1* and prognosis in acute lymphoblastic leukemia. *N Engl J Med*. 2009; 360: 470-80.

**Supplementary Figure 18: *Bach2* recapitulates a common gene expression signature of *BCR-ABL1* inhibition and *Myc/Stat5*-deletion**

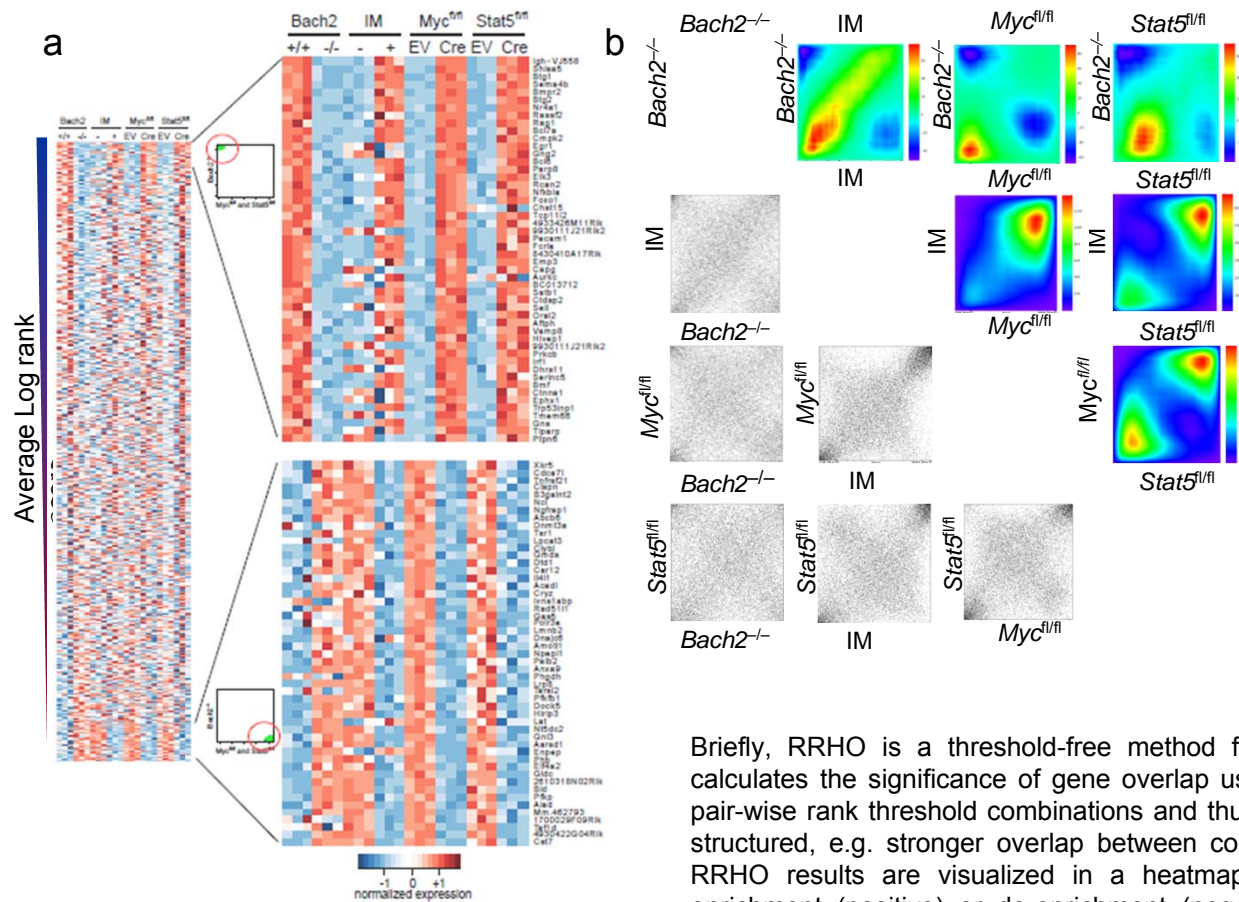

(a) The *Bach2*<sup>-/-</sup> gene expression signature demonstrates a significant overlap with the signatures of *BCR-ABL1* inhibition by imatinib treatment (IM), *Myc*-deletion (*Myc*<sup>fl/fl</sup>), and *Stat5*-deletion (*Stat5*<sup>fl/fl</sup>). In addition to enrichment of commonly upregulated genes (lower-left corners in scatter plots and RRHO maps), the *Bach2*<sup>-/-</sup> signature comparisons also prominently display an enrichment of genes anti-correlated between the *Bach2*<sup>-/-</sup> and the other gene signatures (blue significance values in left-upper and right-lower corners in scatter plots and heat maps). For this analysis, the overlap between the gene expression signatures was visualized with perturbation rank-based scatter plots (lower left plots) and statistically analyzed with rank-rank hypergeometric overlap (RRHO) heat maps (upper right plots). See Plaisier *et al.* for a detailed explanation of the RRHO procedure.

Briefly, RRHO is a threshold-free method for the comparison of ranked gene lists, which calculates the significance of gene overlap using the hypergeometric distribution at all possible pair-wise rank threshold combinations and thus allows for a detailed analysis how the overlap is structured, e.g. stronger overlap between consistently down-regulated vs. up-regulated genes. RRHO results are visualized in a heatmap for enrichment (positive) or de-enrichment (negative) compared to random expectations. In the heatmap, the axes coordinates correspond to the rank thresholds used in the hypergeometric calculation. RRHO can be thought of as a two-dimensional analog of the Gene Set Enrichment Analysis (GSEA).

(b) Heatmap representation of genes anti-correlated between the *Bach2*<sup>-/-</sup> and the other gene expression signatures. Each row of the heatmap represents a gene, each column a sample. For this representation, each gene value was mean centered and scaled by its standard deviation within each experimental batch of control and perturbation matched samples. These normalized expression values are color-coded according to the scale bar shown below. To focus on the anti-correlated genes, the genes in the heatmap were ranked by their differential perturbation score rank between the *Bach2*<sup>-/-</sup> and the *Myc*<sup>fl/fl</sup> and *Stat5*<sup>fl/fl</sup> signatures (see methods section for an explanation of the perturbation score). With this, the 50 genes ranked at the top (upper zoom-in) represent anti-correlated genes enriched in the upper-left corners in the RRHO maps (see (a), blue values) and the 50 genes ranked at the bottom (lower zoom-in) represent anti-correlated genes enriched in the lower-right corners in the RRHO maps.

**Supplementary Figure 19: Bach2-deficient pre-B cells are permissive to overexpression of Myc**

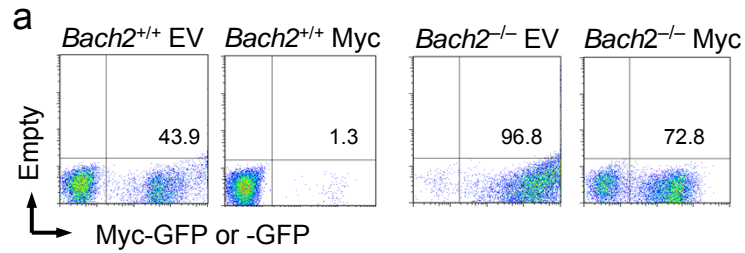

(a) Flow cytometry depicting the percentages of GFP<sup>+</sup> cells after transduction of *Bach2*<sup>+/+</sup> and *Bach2*<sup>-/-</sup> pre-B ALL cells (*BCR-ABL1*) with Myc-GFP or an empty GFP vector control (EV).

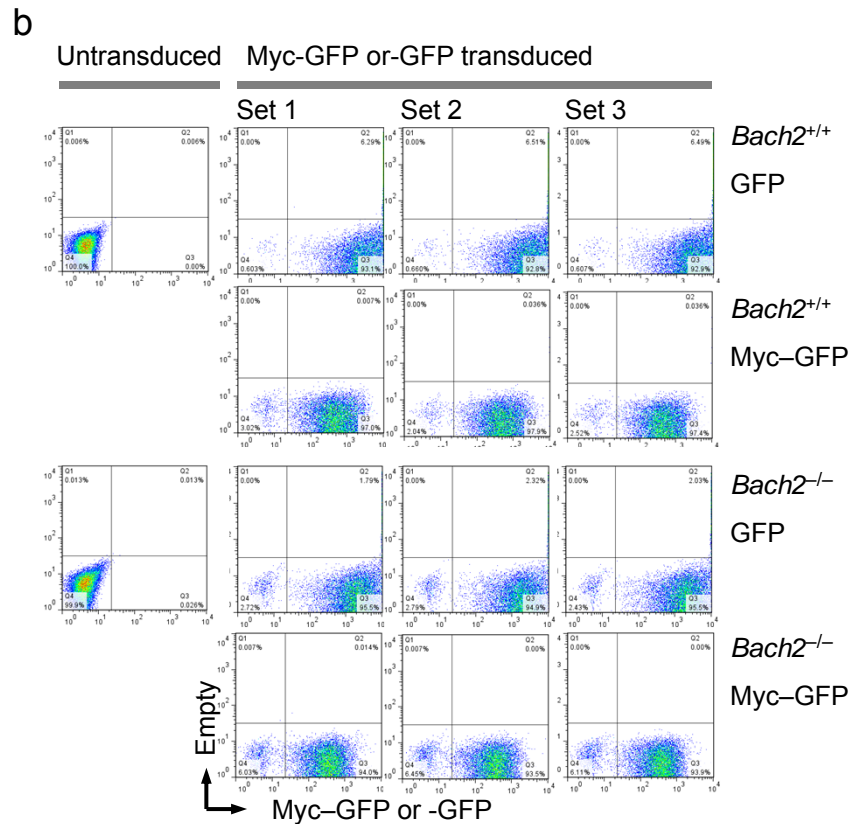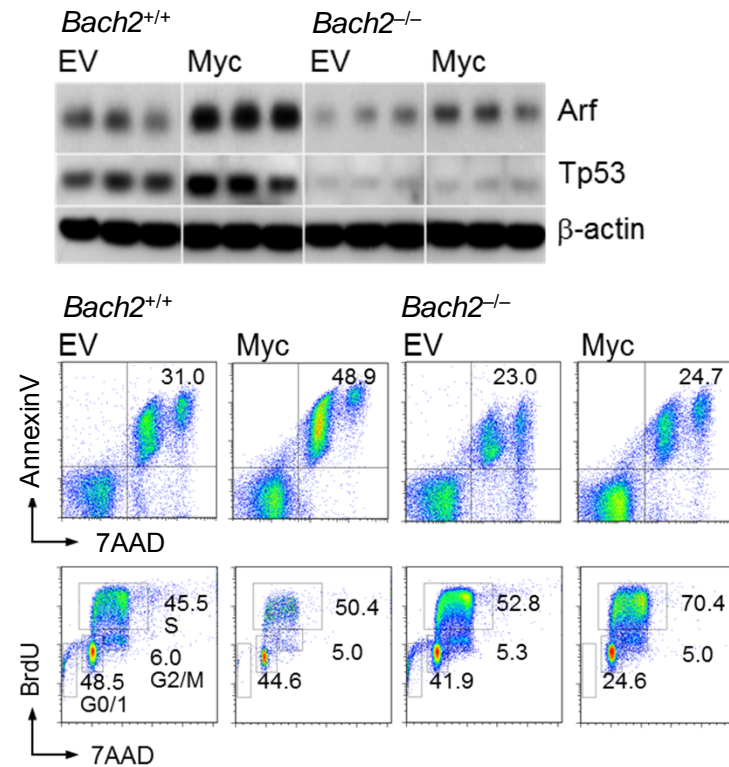

(b) For Western blot experiments (top right) and flow cytometry experiments (bottom right), *Bach2*<sup>+/+</sup> and *Bach2*<sup>-/-</sup> pre-B ALL cells (*BCR-ABL1*) were transduced with Myc-GFP or an empty vector (EV) control (GFP), and then sorted based on GFP expression. Western blot analysis of sorted Myc-GFP- and EV-GFP-transduced *Bach2*<sup>+/+</sup> and *Bach2*<sup>-/-</sup> pre-B leukemia cells for expression of Arf and Tp53 was performed using β-actin as loading control (top right). Viability and cell cycle progression of Myc-GFP- and EV-GFP-transduced *Bach2*<sup>+/+</sup> and *Bach2*<sup>-/-</sup> pre-B ALL cells (*BCR-ABL1*) was measured by Annexin V/7AAD staining and BrdU staining (bottom right).

## Supplementary Figure 20: Bach2 limits Myc-mediated normal pre-B cell transformation

a

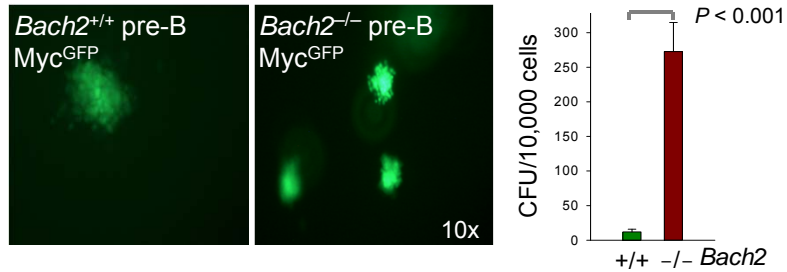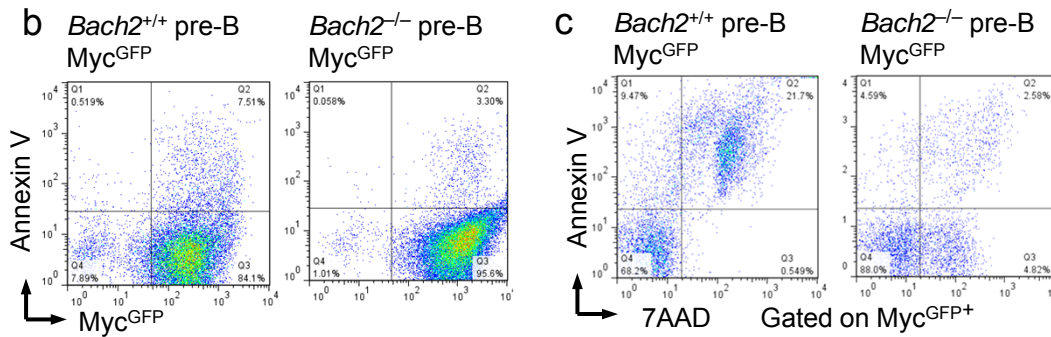

(a) Comparison of the abilities of Myc<sup>GFP</sup>-transduced *Bach2*<sup>+/+</sup> and *Bach2*<sup>-/-</sup> IL7-dependent pre-B cells to form colonies on semi-solid methylcellulose medium. Comparison of percentages of Myc-GFP<sup>+</sup> cells in (b) early and (c) late apoptotic stages after Myc overexpression in *Bach2*<sup>+/+</sup> and *Bach2*<sup>-/-</sup> IL7-dependent pre-B cells.

**Supplementary Figure 21: Flow cytometry of bone marrow and spleen isolated from mice injected with Myc<sup>GFP</sup> -transduced *Bach2*<sup>+/+</sup> and *Bach2*<sup>-/-</sup> pre-B cells**

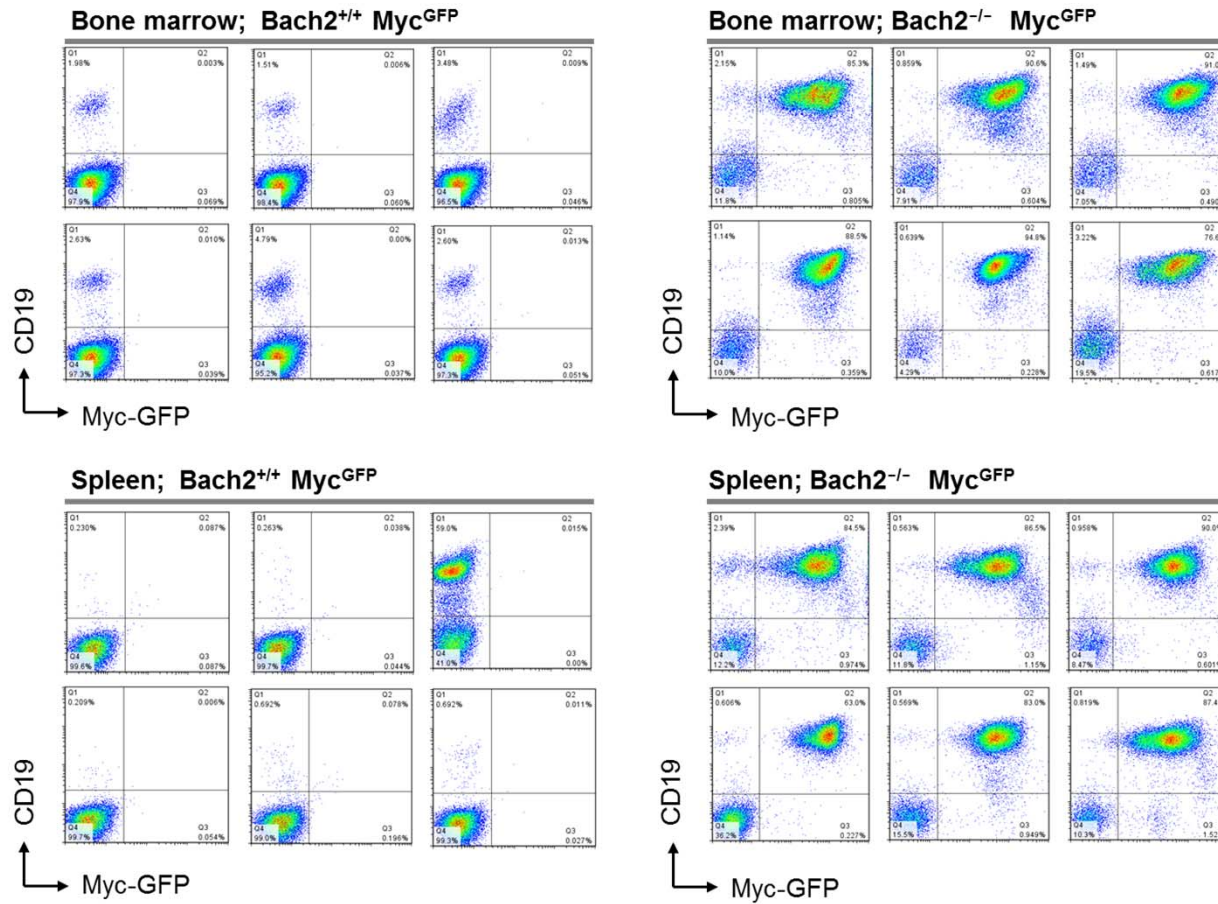

Bone marrows (top) and spleens (bottom) of NOG mice injected with Myc<sup>GFP</sup>-transduced *Bach2*<sup>+/+</sup> and *Bach2*<sup>-/-</sup> IL7-dependent pre-B cells were studied for CD19<sup>+</sup> GFP<sup>+</sup> cells (i.e. leukemia) by flow cytometry.

**Supplementary Figure 22: The balance between BACH2 and BCL6 determines pre-B cell receptor checkpoint control and propensity to leukemic transformation**

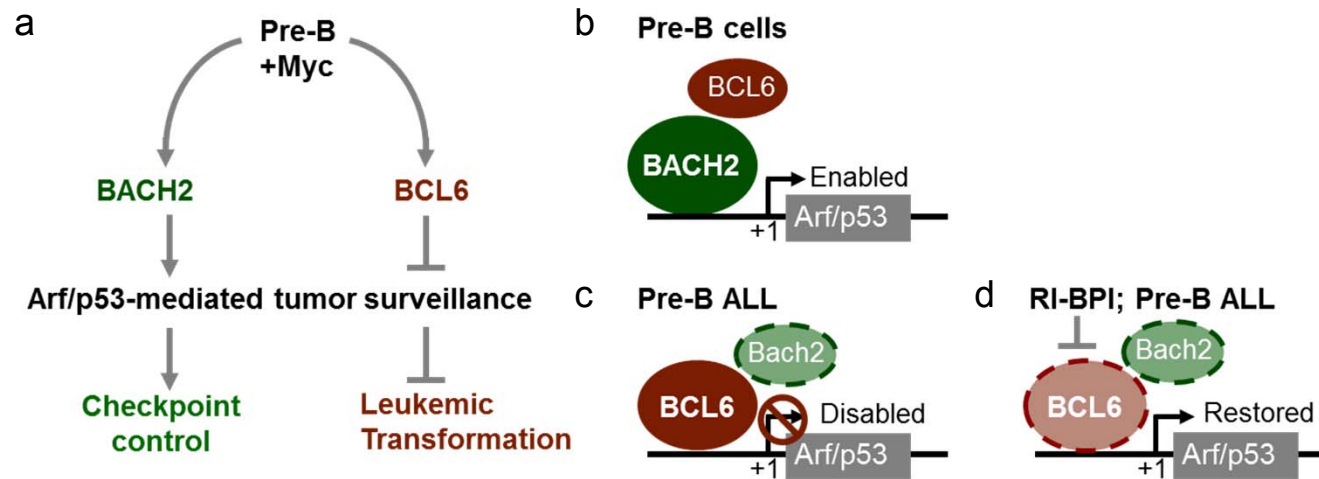

(a) Activation of protooncogenes (e.g. Myc) in pre-B cells causes either Arf/p53-dependent failsafe control (BACH2) or leukemic transformation (BCL6). The divergent outcomes of oncogene activation are influenced by BACH2 and its competitive inhibitor, BCL6. (b) In normal pre-B cells, BACH2 mediates pre-B cell receptor checkpoint control and tumor suppression through activation of ARF/TP53. (c) In pre-B ALL, *BACH2* is frequently inactivated. In the absence of BACH2, the ARF/TP53 pathway is disabled through transcriptional repression by BCL6 and the outcome of Myc-overexpression is leukemic transformation. (d) As potential therapeutic intervention, we propose to use BCL6 inhibitors (e.g. RI-BPI) to restore the balance between BACH2 and BCL6 and to relieve BCL6-mediated transcriptional repression of ARF/TP53.



**Supplementary Table 1: Overview of clinically-derived human samples of Ph<sup>+</sup> ALL used in the study**

| Case                 | Cytogenetics                                                     | Oncogene                          | Clinical course    | Gender/Age |
|----------------------|------------------------------------------------------------------|-----------------------------------|--------------------|------------|
| <b>Primary cases</b> |                                                                  |                                   |                    |            |
| LAX2                 | t(9;22)(q34;q11)                                                 | <i>BCR-ABL1</i> ; p210, T315I     | Relapse (Imatinib) | m/38       |
| LAX9                 | t(9;22)(q34;q11)<br>del(12)(p12;p13)                             | <i>BCR-ABL1</i> ; p190, unmutated | At diagnosis       | m          |
| SFO2                 | t(9;22)(q34;q11)                                                 | <i>BCR-ABL1</i> ; p210, unmutated | at diagnosis       | m/7        |
| BLQ1                 | FISH der(9), der(22)                                             | <i>BCR-ABL1</i> ; p210, T315I     | Relapse (Imatinib) |            |
| BLQ4                 | FISH der(9), der(22)                                             | <i>BCR-ABL1</i> ; p210, unmutated | Relapse (Imatinib) | f          |
| BLQ5                 | FISH der(9), der(22)                                             | <i>BCR-ABL1</i> ; p190, T315I     | Relapse (Imatinib) | f          |
| BLQ6                 | FISH der(9), der(22)                                             | <i>BCR-ABL1</i> ; n.d.            | Relapse (Imatinib) | m          |
| BLQ11                | FISH der(9), der(22)                                             | <i>BCR-ABL1</i> ; p210, T315I     | Relapse (Imatinib) | m          |
| TXL1                 | t(9;22)(q34;q11)                                                 | <i>BCR-ABL1</i> ; n.d., unmutated | at diagnosis       | m/19       |
| TXL2                 | t(9;22)(q34;q11)                                                 | <i>BCR-ABL1</i> ; p210, unmutated | at diagnosis       |            |
| TXL3                 | t(9;22)(q34;q11)                                                 | <i>BCR-ABL1</i> ; p210, unmutated | at diagnosis       |            |
| TXL4                 | t(9;22)(q34;q11)                                                 | <i>BCR-ABL1</i> ; p190, unmutated | at diagnosis       | f/56       |
| ICN1                 | t(9;22)(q34;q11)                                                 | <i>BCR-ABL1</i> ; p210, unmutated | at diagnosis       |            |
| ICN10                | der(9)(q10)t(9;22)(q34;q11)                                      | <i>BCR-ABL1</i> ; n.d.            | at diagnosis       | f          |
| NCL37                | 46,XY,add(9)(q34),<br>del(11)(q23)[3]/46,XY[6]                   | <i>ABL1</i>                       | Relapse            | m/5.3      |
| NCL45                | 55-59,XY,+X,+1,del(1)(p3)<br>+2,+5,+6,+8,+10,+11,+12             | n.d.                              | Relapse            | m/13.7     |
| NCL64                | 47,XX,t(1;11)(p21.3q22.1)                                        | n.d.                              | Relapse            | f/2.5      |
| NCL68                | Fail                                                             | n.d.                              | Relapse            | m/11.3     |
| NCL169               | 45,XY,-20[46]/46,XY[19]                                          | n.d.                              | Relapse            | m/3.5      |
| NCL173               | 46,XY,t(8;14)(q24;q11)                                           | <i>MYC</i>                        | Relapse            | m/2.3      |
| NCL296               | Fail                                                             | n.d.                              | Relapse            | f/14.1     |
| NCL405               | 46,XY,t(11;19)(q23;p13.3)<br>[6]/47,idem,+X[3]                   | <i>MLL-ENL</i>                    | Relapse            | m/3.4      |
| NCL554               | 43-46,XY,der(3;17)(q10;q10),n.d.<br>+8,16,add(19)(q13) [cp5]/46, |                                   | Relapse            | m/7        |
| NCL578               | 46,XX[20]                                                        | n.d.                              | Relapse            | f/3.7      |
| NCL625               | 46,XY,t(17;19)(q21;p13)                                          | <i>TCF3-HLF</i>                   | Relapse            | m/14       |

**Notes:** All primary samples are bone marrow biopsies, blast content >80%; LAX, Los Angeles; BLQ, Bologna; TXL, Berlin; SFO, San Francisco; ICN, Seoul; n.d., not done; f, female; m, male

**Supplementary Table 2: Overview of ALL cell lines used in the study**

| Case           | Cytogenetics                                                                                                                                                                                                                                                                              | Oncogene        | Clinical course   | Gender/Age |
|----------------|-------------------------------------------------------------------------------------------------------------------------------------------------------------------------------------------------------------------------------------------------------------------------------------------|-----------------|-------------------|------------|
| BEL-1          | 46, XX, t (4; 11)(q21; q23),<br>del (6)(q11q21),<br>der (7) t (7)(q10)<br>add (7)(q36), +13, -15                                                                                                                                                                                          | <i>MLL-AF4</i>  | Relapse           | f/41       |
| HPB-Null       | n.d.                                                                                                                                                                                                                                                                                      | n.d.            | n.d.              | m/47       |
| EB2            | n.d.                                                                                                                                                                                                                                                                                      | <i>MYC-IGH</i>  | n.d.              | f/7        |
| LC4-1          | n.d.                                                                                                                                                                                                                                                                                      | n.d.            | n.d.              | f/13       |
| MN-60          | 46(45-47)<2n>XY,<br>dup(1)(q21q41), del(6)(q21),<br>t(8;14)(q24;q32), i(13q)                                                                                                                                                                                                              | <i>MYC-IGH</i>  | Partial Remission | m/20       |
| U-698-M        | 49(44-50)<2n>XY, +3, +7,<br>-14, +mar, dup(1)(q43q21.2),<br>der(2)t(2;3)(p16;p11),<br>add(3)(p11), del(6)(q15q22),<br>add(3)(p11), del(6)(q15q22),<br>del(9)(p22), dup(11)(q23q13),<br><br>add(13)(p12), add(16)(q24),<br>carries large submetacentric<br>dup(1) marker                   | n.d.            | at diagnosis      | m/7        |
| BE-13          | 81-89<4n>XXXX, +1,<br>+4, -9, -9, -10, -16, -21,<br>del(1)(q13.2), add(1)(p11-21),<br>del(4)(q11q31.2)/i(4p)x2,<br>i(4q)del(4q31.2)/i(4q)add(4)(q31)x2,<br>del(5)(q14q21)x2, del(6)(q22)x2,<br>del(9)(p22)x2,<br>der(17)t(17;?21)(p11;q11)x2<br>- 5q- and apparent 9p22-pter<br>nullisomy | n.d             | Relapse           | f/11       |
| 697            | 46(45-48)<2n>XY, t(1;19)<br>(q23;p13), del(6)(q21)                                                                                                                                                                                                                                        | <i>E2A-PBX1</i> | Relapse           | m/12       |
| MHH-<br>CALL-3 | 46(45-46)<2n>XX, del(6)(q15),<br>der(9)t(9;9)(p21;q11),<br>der(19)t(1;19)(q23;p13) -<br>carries t(1;19) primary and 6q-<br>secondary rearrangements<br>associated with pre B-ALL                                                                                                          | <i>E2A-PBX1</i> | at diagnosis      | f/11       |

**Supplementary Table 3: Overview of mouse strains used in this study**

| Mouse strain                               | Source                                     | Purpose                                               |
|--------------------------------------------|--------------------------------------------|-------------------------------------------------------|
| <i>Bach2</i> <sup>-/-</sup>                | Kazuhiko Igarashi, Tohoku University       | Genetic loss-of-function experiments                  |
| <sup>a</sup> <i>Bcl6</i> <sup>-/-</sup>    | Riccardo Dalla-Favera, Columbia University | Genetic loss-of-function experiments                  |
| <sup>b</sup> <i>Myc</i> <sup>fl/fl</sup>   | Ignacio Moreno de Alborán, CINES           | Inducible deletion of <i>Myc</i>                      |
| <sup>c</sup> <i>Stat5</i> <sup>fl/fl</sup> | Lothar Hennighausen, NIDDK                 | Inducible deletion of <i>Stat5a</i> and <i>Stat5b</i> |
| NOD/SCID<br>IL2rg <sup>-/-</sup> (NSG)     | Jackson Laboratories                       | Xenograft recipient mice                              |
| <i>Tp53</i> <sup>-/-</sup>                 | Jackson Laboratories                       | Analysis of <i>Tp53</i> as Bach2 target gene          |
| <i>Arf</i> <sup>-/-</sup>                  | Jackson Laboratories                       | Analysis of <i>Arf</i> as Bach2 target gene           |

**Notes:**

- a Ye BH, Cattoretti G, Shen Q, Zhang J, Hawe N, de Waard R, Leung C, Nouri-Shirazi M, Orazi A, Chaganti RS, Rothman P, Stall AM, Pandolfi PP, Dalla-Favera R. The BCL-6 proto-oncogene controls germinal-centre formation and Th2-type inflammation. *Nat Genet.* 1997; 16: 161-70.
- b de Alboran IM, O'Hagan RC, Gartner F, Malynn B, Davidson L, Rickert R, Rajewsky K, DePinho RA, Alt FW. Analysis of c-Myc function in normal cells via conditional gene-targeted mutation. *Immunity.* 2001; 14:45-55.
- c Liu X, Robinson GW, Wagner KU, Garrett L, Wynshaw-Boris A, Hennighausen L. Stat5a is mandatory for adult mammary gland development and lactogenesis. *Genes Dev.* 1997; 11: 179-86.

#### Supplementary Table 4: Sequences of oligonucleotide primers used

##### Quantitative RT-PCR

|                  |                               |
|------------------|-------------------------------|
| <i>Bcl6</i> _F   | 5'-CCTGCAACTGGAAGAAGTATAAG-3' |
| <i>Bcl6</i> _R   | 5'-AGTATGGAGGCACATCTCTGTAT-3' |
| <i>Bach2</i> _F  | 5'-TGAGGTACCCACAGACACCA-3'    |
| <i>Bach2</i> _R  | 5'-TGCCAGGACTGTCTTCACTG-3'    |
| <i>Hprt</i> _F   | 5'-GGGGGCTATAAGTTCTTTGC-3'    |
| <i>Hprt</i> _R   | 5'-TCCAACACTTCGAGAGGTCC-3'    |
| <i>Btg2</i> _F   | 5'-GATGGCTCCATCTGTGTCCT-3'    |
| <i>Btg2</i> _R   | 5'-TATACGGTGGCCTGTTGTCA-3'    |
| <i>Rag2</i> _F   | 5'-GCAGATGGTAACAGTGGGTC-3'    |
| <i>Rag2</i> _R   | 5'-ATTGCAGGCTTCAGTTTGAG-3'    |
| <i>Rag1</i> _F   | 5'-TAACAACCAAGCTGCAGACA-3'    |
| <i>Rag1</i> _R   | 5'-CCTCTGAGGAATCCTTCTCC-3'    |
| <i>GFP</i> _F    | 5'-AGGAGCGCACCATCTTCTT-3'     |
| <i>GFP</i> _R    | 5'-GCCATGATATAGACGTTGTGG-3'   |
| <i>Trp53</i> _F  | 5'-TCCTTACCATCATCACTGG-3'     |
| <i>Trp53</i> _R  | 5'-CGGATCTTGAGGGTGAAATAC-3'   |
| <i>Cdkn2a</i> _F | 5'-GGACCAGGTGATGATGATG-3'     |
| <i>Cdkn2a</i> _R | 5'-ATCGCACGATGTCTTGATG-3'     |

##### Primers for cloning MSCV Bach2-ER<sup>T2</sup> IRES GFP plasmid

|                 |                                  |
|-----------------|----------------------------------|
| <i>BACH2</i> _F | 5'- AAAGGATCCGTCTGATCCCTTGCT -3' |
| <i>BACH2</i> _R | 5'- AACTCGAGGGTATAATCTTTCCT -3'  |

##### Clonality and spectratyping analysis

|                             |                               |
|-----------------------------|-------------------------------|
| <i>V<sub>H</sub>1</i> _F    | 5'- AAGGCCACACTGACTGTAGAC -3' |
| <i>C<sub>μ</sub></i> _R     | 5'- TGGCCACCAGATTCTTATCAG -3' |
| <i>C<sub>μ</sub></i> -FAM_R | 5'- AGACGAGGGGGAAGACATTTG -3' |

**Supplementary Table 4 - continued: Sequences of oligonucleotide primers used**

**Mutation analysis in *BACH2* translated region (from *BACH2* cDNA)**

**Primers to amplify *BACH2* coding region**

|         |                             |
|---------|-----------------------------|
| Set A_F | 5'-TTACATGGTGTGAACGGCATG-3' |
| Set A_R | 5'-CCTGGCTGTGACCTCCTC-3'    |
| Set B_F | 5'-AGGAGGTCACAGCCAGG-3'     |
| Set B_R | 5'-GATGCTCTCTTCCTCATTCT-3'  |
| Set C_F | 5'-ACGCTCTGCCTGTCTGGAGA-3'  |
| Set C_R | 5'-CGGCTCAGAGAGGTCTTTGT-3'  |
| Set D_F | 5'-GTGCCAAAGGGTCTGTGGGT-3'  |
| Set D_R | 5'-CTCACACACCAATTTGCGGA-3'  |
| Set E_F | 5'-AAAGAGAACTGTTGTCAGAG-3'  |
| Set E_R | 5'-CTAGGTATAATCTTTCCTGG-3'  |

**Primers for sequencing *BACH2* coding region**

|             |                             |
|-------------|-----------------------------|
| Set A seq_F | 5'-GTGTGAACGGCATGTCTGTG-3'  |
| Set A seq_R | 5'-CCTGGCTGTGACCTCCTC-3'    |
| Set B seq_F | 5'-TCACAGCCAGGGGCTTTG -3'   |
| Set B seq_R | 5'-GATGCTCTCTTCCTCATTCT-3'  |
| Set C seq_F | 5'-GCCTGTCTGGAGATGAGCC-3'   |
| Set C seq_R | 5'-CGGCTCAGAGAGGTCTTTGT-3'  |
| Set D seq_F | 5'-GGGTCTGTGGGTGGGAGC-3'    |
| Set D seq_R | 5'-CTCACACACCAATTTGCGGA-3'  |
| Set E seq_F | 5'-AAACTGTTGTCAGAGAGGAAT-3' |
| Set E seq_R | 5'-CTAGGTATAATCTTTCCTGG-3'  |

**\*Position of primers used for mutation analysis on *BACH2* cDNA**

| <b>Name of primer</b> | <b>Region of <i>BACH2</i> cDNA spanned (bp)</b> |
|-----------------------|-------------------------------------------------|
| Set A                 | 691 - 963                                       |
| Set B                 | 947 - 1575                                      |
| Set C                 | 1576 - 2091                                     |
| Set D                 | 2092 - 2760                                     |
| Set E                 | 2761 - 3234                                     |
| Set A seq             | 698 - 963                                       |
| Set B seq             | 953 - 1575                                      |
| Set C seq             | 1583 - 2091                                     |
| Set D seq             | 2100 - 2760                                     |
| Set E seq             | 2767 - 3234                                     |

**Supplementary Table 4: qChIP primers used**

|                        |                            |
|------------------------|----------------------------|
| <i>Cdkn2a</i> _F       | 5'-TAGATGGACTCGGAGCAAGG-3' |
| <i>Cdkn2a</i> _R       | 5'-TTTCGCTCCGGTTAACTTTC-3' |
| <i>Trp53</i> region1_F | 5'-GCCGAGGCTAGAGTGCATTA-3' |
| <i>Trp53</i> region1_R | 5'-TCCCTGGTGATTGCTTTAGG-3' |
| <i>Trp53</i> region2_F | 5'-GAAACCCTGGGGTTGATTTT-3' |
| <i>Trp53</i> region2_R | 5'-AGTTCCAGGCAAACATGGAC-3' |

**Supplementary Table 4 - continued:** qChIP primers used

|                     |                               |
|---------------------|-------------------------------|
| <i>Bcl6</i> exon1_F | 5'-CCGAGAATTGAGCTCTGTTGA-3'   |
| <i>Bcl6</i> exon1_R | 5'-GGCAGCAACAGCAATAATCA-3'    |
| <i>Acta1</i> _F     | 5'-AGAGTCAGAGCAGCAGGTAG-3'    |
| <i>Acta1</i> _R     | 5'-CAAGGCTCAATAGCTTTCTT-3'    |
| <i>BLNK</i> _F      | 5'-GCCTGGCTTCAAGTAAAAGTGT-3'  |
| <i>BLNK</i> _R      | 5'-CTTCTCAGCCTGGAAATTATGG-3'  |
| <i>BACH2</i> _F     | 5'-CCTACCTGGCAAAAACAAAAC-3'   |
| <i>BACH2</i> _R     | 5'-TCTTTTTGAGCAGTGGCATAGA-3'  |
| <i>DLEU1</i> _F     | 5'-GGTGTTCCTCCACAGTCTTC-3'    |
| <i>DLEU1</i> _R     | 5'-GAAATGCTGACTCACAGACACAG-3' |
| <i>DLEU2</i> _F     | 5'-CAGGCTCTAACTGCCAAATCTT-3'  |
| <i>DLEU2</i> _R     | 5'-TGC GTTAGGAGAAGGGAAATAA-3' |
| <i>GADD45A</i> _F   | 5'-GGAAGAGATCCCTGTGAGTCAG-3'  |
| <i>GADD45A</i> _R   | 5'-TCTGCCCTGCTAAAGGAATTAG-3'  |
| <i>GADD45B</i> _F   | 5'-TCAAATGATGACTCAGCTCCAT-3'  |
| <i>GADD45B</i> _R   | 5'-CTGCAAAGATGAACAAAACGAG-3'  |
| <i>EBF1</i> _F      | 5'-GACTTTCTTGCTGTGTCATTTCG-3' |
| <i>EBF1</i> _R      | 5'-GCCACATGTCAGCATTTTCTAA-3'  |
| <i>SYK</i> _F       | 5'-TTGGTCCAATCAGTCATAGCAG-3'  |
| <i>SYK</i> _R       | 5'-TTCTAGGTCAGCACATGCAAAT-3'  |
| <i>CDKN1A</i> _F    | 5'-GCCACAGAACAGGACTCTGTC-3'   |
| <i>CDKN1A</i> _R    | 5'-ACTGCAGCTCCGTCTCTATTC-3'   |
| <i>CDKN1B</i> _F    | 5'-AAGAATGGTGGAGTTGAGTGCT-3'  |
| <i>CDKN1B</i> _R    | 5'-CCAAATGTTTCTGCGAAGGT-3'    |
| <i>BCL6</i> _F      | 5'-GCAGTGGTAAAGTCCGAAGC-3'    |
| <i>BCL6</i> _R      | 5'-AGCAACAGCAATAATCACCTG-3'   |
| <i>RHOH</i> _F      | 5'-TGCTTAGCTGTGGTTCAGTGAT-3'  |
| <i>RHOH</i> _R      | 5'-TGCTTCGGTCACAATGTTTTAC-3'  |
| <i>POU2AF1</i> _F   | 5'-TCCTCTGGAAAACGTTGATCTT-3'  |
| <i>POU2AF1</i> _R   | 5'-CTCCCAGTTGAGAACCAGTGAC-3'  |
| <i>HIVEP1</i> _F    | 5'-TGCCTTAGAGCTGCTCCTAGAT-3'  |
| <i>HIVEP1</i> _R    | 5'-TATGTGCACAGTCACGTTACCA-3'  |
| <i>EGR3</i> _F      | 5'-TTCGTGGTGAAGAGGAAAGAAT-3'  |
| <i>EGR3</i> _R      | 5'-TTGGAACCGTTAGGGAATTTA-3'   |
| <i>RAG1</i> _F      | 5'-TTGCTCTCAATAATGGGGACT-3'   |
| <i>RAG1</i> _R      | 5'-AGGAAGGTTGATGCTCCTTG -3'   |
| <i>RAG2</i> _F      | 5'-TAGCAGAGCTGGCAAAGAAA -3'   |
| <i>RAG2</i> _R      | 5'-AATGCAAGGCTCAGAAGGAA -3'   |

**Supplementary Table 5: Antibodies used for Western blotting and flow cytometry****Western blot**

| <b>Antigen</b>   | <b>Clone ID</b> | <b>Dilution</b> | <b>Source</b>                                  |
|------------------|-----------------|-----------------|------------------------------------------------|
| BACH2            |                 | 1:1000          | Ari Melnick, Weill Cornell Medical College, NY |
| Actb             | C4              | 1:10,000        | Santa Cruz Biotechnology                       |
| TP53             | IC12            | 1:1000          | Cell Signaling Technology                      |
| Cdkn2a (p19 Arf) | Ab80            | 1:1000          | Abcam                                          |
| TP53             | DO-7            | 1:1000          | BD                                             |
| CDKN2A (p14 ARF) | Ab470           | 1:1000          | Abcam                                          |

**Flow cytometry**

| <b>Surface Antigen</b> | <b>Clone ID</b> | <b>Source</b> |
|------------------------|-----------------|---------------|
| CD19                   | 1D3             | BD            |
| Sca-1 (Ly6f)           | D7              | BD            |
| Nt5e (CD73)            | TY/23           | BD            |
| CD80                   | 16-10A1         | BD            |
| K light chain          | 187.1           | BD            |
| IL2R $\alpha$ (CD25)   | 7D4             | BD            |
| B220                   | RA3-6B2         | BD            |
| IgD                    | 11-26c.2a       | BD            |
| IgM                    | R6-60.2         | BD            |

### Supplementary Table 6: Retroviral vectors used in the study

| Constitutive expression                                     | Inducible activation             |
|-------------------------------------------------------------|----------------------------------|
| MSCV <i>BCR-ABL 1</i> -IRES-Neo                             |                                  |
| MSCV Myc-IRES-GFP                                           | MSCV-ER <sup>T2</sup> -Puro      |
| MSCV Bach2-IRES-GFP                                         | MSCV-Cre-ER <sup>T2</sup> -Puro  |
| MSCV IRES-GFP                                               | MSCV-ER <sup>T2</sup> -GFP       |
| EGZ Pax5                                                    | MSCV-Bach2-ER <sup>T2</sup> -GFP |
| EGZ                                                         |                                  |
| MI $\mu$ HC-CD8                                             |                                  |
| MI CD8                                                      |                                  |
| MOWS-RSS-eGFP-RSS (Recombination signal sequence substrate) |                                  |

Transfections of the above retroviral constructs were performed as discussed in the online methods section.

### Supplementary Table 7: Accession numbers for somatic mutations in the *BACH2* gene in clinically-derived human Ph<sup>+</sup> ALL cells

| Ph <sup>+</sup> ALL case | Mutation | Accession number (EMBL) |
|--------------------------|----------|-------------------------|
| TXL3                     | C1039T   | HE578168                |
| ICN1                     | C1779T   | HE578164                |
|                          | C1039T   | HE578169                |
| SFO2                     | C1039T   | HE578170                |
| LAX9                     | C1779T   | HE578165                |
| BLQ1                     | G938T    | HE578163                |
|                          | C1039T   | HE578173                |
| PDX59                    | A2214G   | HE578166                |
|                          | C1039T   | HE578176                |



**Supplementary Table 8: Summary of accession numbers for gene expression and ChIP sequencing data**

| <b>GEO accession</b> | <b>GEO description</b>                                                                                                                      | <b>Results</b>                                                                                                                                                                       | <b>Figure</b>                                 |
|----------------------|---------------------------------------------------------------------------------------------------------------------------------------------|--------------------------------------------------------------------------------------------------------------------------------------------------------------------------------------|-----------------------------------------------|
| GSE30883             | Role and function of Bach2 in <i>BCR-ABL1</i> - driven pre-B ALL                                                                            | Differential gene expression in <i>Bach2</i> <sup>+/+</sup> and <i>Bach2</i> <sup>-/-</sup> <i>BCR-ABL1</i> -transformed ALL cells in the presence and absence of imatinib treatment | Figs. 2f and 3a, Supplementary Figs. 4 and 18 |
| GSE30928             | Role and function of Myc in <i>BCR-ABL1</i> - driven pre-B cells                                                                            | Gene expression changes after <i>Myc</i> deletion in <i>BCR-ABL1</i> - driven pre-B ALL.                                                                                             | Supplementary Fig. 18                         |
| GSE24814             | Role and function of Stat5 in <i>BCR-ABL1</i> - driven pre-B cells                                                                          | Gene expression changes after <i>Stat5</i> deletion in <i>BCR-ABL1</i> - driven pre-B ALL.                                                                                           | Supplementary Fig. 18                         |
| GSE20987             | Gene expression data of <i>BCR-ABL1</i> - transformed B cell precursors from <i>Bcl6</i> <sup>+/+</sup> and <i>Bcl6</i> <sup>-/-</sup> mice | Comparison of gene expression changes between <i>Bcl6</i> <sup>+/+</sup> and <i>Bcl6</i> <sup>-/-</sup> <i>BCR-ABL1</i> - transformed ALL cells                                      | Fig. 2f                                       |
| GSE30889             | Role and function of Pax5 in <i>BCR-ABL1</i> - driven pre-B ALL                                                                             | Comparison of gene expression changes before and after Pax5 overexpression in <i>BCR-ABL1</i> -driven pre-B ALL                                                                      | Fig. 1a                                       |
| GSE31027             | Effects of pre-B cell receptor in <i>BCR-ABL1</i> - driven pre-B ALL                                                                        | Comparison of gene expression changes before and after $\mu$ heavy chain overexpression in <i>BCR-ABL1</i> - driven pre-B ALL                                                        | Fig. 1a                                       |
| GSE28460             | Expression data from ALL diagnosis and relapse pediatric acute lymphoblastic leukemia cases                                                 | Pairwise comparison of <i>BACH2</i> expression levels in ALL patients at diagnosis and relapse                                                                                       | Fig. 5a, Supplementary Fig. 15                |
| GSE41042             | Effect of Bach2 overexpression in <i>Bcl6</i> <sup>+/+</sup> and <i>Bcl6</i> <sup>-/-</sup> <i>BCR-ABL1</i> -transformed pre-B cells        | Gene expression changes arising after Bach2 overexpression in different <i>Bcl6</i> genotypes                                                                                        | Fig. 2c, Supplementary Fig. 4                 |
| GSE44420             | ChIP sequencing using BACH2 and BCL6 antibodies in OCI-Ly7 cells                                                                            | Comparison of binding of BACH2 and BCL6 to promoters of tumor suppressor genes                                                                                                       | Supplementary Fig. 2, Fig. 2a                 |
| GSE34941             | SuperSeries composed of GSE34861 and GSE34937; GSE34861: <i>BACH2</i> gene expression in primary ALL cases;                                 | Gene expression of <i>BACH2</i> in different subgroups of ALL patients                                                                                                               | Supplementary Fig. 14                         |
